# Supplementary material for: Analysis of Genomic Regions Associated With Coronary Artery Disease Reveals Continent-Specific Single Nucleotide Polymorphisms in North African Populations
Source: PubMed Central journal article supplement (PMC4848325; doi:10.2188/jea.je20150034), 2016-05-05
Supplement: je-26-264-s001.pdf [file je-26-264-s001.pdf]

**eTable 1.** Genomic location of the genetic variants, genotyping and imputation details

| CHR | BP        | SNP        | Region | Status | Al1 | Al2 | ATVB    |       |         |       | Regicor |       |         |       |
|-----|-----------|------------|--------|--------|-----|-----|---------|-------|---------|-------|---------|-------|---------|-------|
|     |           |            |        |        |     |     | FreqAl1 | MAF   | Quality | Rsq   | FreqAl1 | MAF   | Quality | Rsq   |
| 1   | 109804646 | rs4970833  | 1p13   | IMPUT  | A   | G   | 0.529   | 0.471 | 0.565   | 0.244 | 0.517   | 0.483 | 0.569   | 0.251 |
| 1   | 109806313 | rs653635   | 1p13   | IMPUT  | T   | C   | 0.919   | 0.082 | 0.858   | 0.265 | 0.909   | 0.091 | 0.850   | 0.308 |
| 1   | 109807283 | rs6657811  | 1p13   | IMPUT  | A   | T   | 0.907   | 0.093 | 0.924   | 0.646 | 0.901   | 0.099 | 0.914   | 0.616 |
| 1   | 109808117 | rs608196   | 1p13   | IMPUT  | C   | T   | 0.918   | 0.082 | 0.859   | 0.268 | 0.909   | 0.091 | 0.850   | 0.311 |
| 1   | 109810981 | rs17035630 | 1p13   | IMPUT  | G   | A   | 0.914   | 0.086 | 0.835   | 0.057 | 0.919   | 0.081 | 0.844   | 0.049 |
| 1   | 109813719 | rs17035665 | 1p13   | IMPUT  | C   | T   | 0.802   | 0.198 | 0.736   | 0.277 | 0.796   | 0.204 | 0.724   | 0.263 |
| 1   | 109814880 | rs4970834  | 1p13   | IMPUT  | C   | T   | 0.879   | 0.121 | 0.960   | 0.848 | 0.865   | 0.135 | 0.960   | 0.866 |
| 1   | 109815252 | rs611917   | 1p13   | IMPUT  | A   | G   | 0.755   | 0.245 | 0.837   | 0.649 | 0.734   | 0.266 | 0.834   | 0.669 |
| 1   | 109817590 | rs12740374 | 1p13   | IMPUT  | G   | T   | 0.819   | 0.181 | 0.997   | 0.990 | 0.806   | 0.194 | 0.998   | 0.993 |
| 1   | 109818306 | rs629301   | 1p13   | GENOT  | T   | G   | 0.820   | 0.181 | 1       | 1     | 0.806   | 0.194 | 1       | 1     |
| 1   | 109818530 | rs646776   | 1p13   | IMPUT  | T   | C   | 0.819   | 0.181 | 0.999   | 0.996 | 0.806   | 0.194 | 0.999   | 0.998 |
| 1   | 109820919 | rs17035949 | 1p13   | GENOT  | T   | G   | 0.948   | 0.052 | 1       | 1     | 0.946   | 0.054 | 1       | 1     |
| 1   | 109821307 | rs583104   | 1p13   | GENOT  | T   | G   | 0.806   | 0.194 | 1       | 1     | 0.790   | 0.210 | 1       | 1     |
| 1   | 109821511 | rs602633   | 1p13   | IMPUT  | G   | T   | 0.823   | 0.177 | 0.970   | 0.919 | 0.809   | 0.191 | 0.966   | 0.915 |
| 1   | 109822166 | rs599839   | 1p13   | GENOT  | A   | G   | 0.807   | 0.193 | 1       | 1     | 0.790   | 0.210 | 1       | 1     |
| 1   | 109822509 | rs14000    | 1p13   | GENOT  | T   | C   | 0.889   | 0.111 | 1       | 1     | 0.881   | 0.119 | 1       | 1     |
| 1   | 109827253 | rs627569   | 1p13   | GENOT  | G   | A   | 0.892   | 0.108 | 1       | 1     | 0.882   | 0.118 | 1       | 1     |
| 1   | 109832283 | rs655246   | 1p13   | IMPUT  | G   | A   | 0.568   | 0.432 | 0.656   | 0.394 | 0.555   | 0.445 | 0.649   | 0.391 |
| 1   | 109833187 | rs17584208 | 1p13   | GENOT  | G   | A   | 0.956   | 0.044 | 1       | 1     | 0.948   | 0.053 | 1       | 1     |
| 1   | 109834938 | rs17645031 | 1p13   | IMPUT  | C   | T   | 0.956   | 0.044 | 0.998   | 0.980 | 0.948   | 0.052 | 0.998   | 0.977 |
| 1   | 109835757 | rs17645143 | 1p13   | IMPUT  | T   | C   | 0.680   | 0.320 | 0.665   | 0.338 | 0.684   | 0.316 | 0.661   | 0.332 |
| 1   | 109838918 | rs629001   | 1p13   | IMPUT  | T   | C   | 0.960   | 0.040 | 0.978   | 0.789 | 0.950   | 0.051 | 0.971   | 0.800 |
| 1   | 109839738 | rs3850615  | 1p13   | IMPUT  | C   | A   | 0.921   | 0.079 | 0.905   | 0.396 | 0.913   | 0.087 | 0.901   | 0.428 |
| 1   | 109840629 | rs600806   | 1p13   | GENOT  | G   | A   | 0.219   | 0.219 | 1       | 1     | 0.239   | 0.239 | 1       | 1     |
| 1   | 109842271 | rs680434   | 1p13   | IMPUT  | C   | T   | 0.263   | 0.263 | 0.939   | 0.851 | 0.278   | 0.278 | 0.941   | 0.857 |
| 1   | 109843775 | rs11583969 | 1p13   | GENOT  | T   | C   | 0.049   | 0.049 | 1       | 1     | 0.064   | 0.064 | 1       | 1     |
| 1   | 109844532 | rs652651   | 1p13   | IMPUT  | A   | G   | 0.242   | 0.242 | 0.963   | 0.921 | 0.261   | 0.261 | 0.961   | 0.919 |
| 1   | 109846278 | rs407102   | 1p13   | IMPUT  | C   | T   | 0.253   | 0.253 | 0.948   | 0.872 | 0.268   | 0.268 | 0.949   | 0.874 |
| 1   | 109848726 | rs592107   | 1p13   | IMPUT  | A   | T   | 0.253   | 0.253 | 0.948   | 0.870 | 0.268   | 0.268 | 0.949   | 0.873 |
| 1   | 109851127 | rs444387   | 1p13   | IMPUT  | A   | G   | 0.252   | 0.252 | 0.922   | 0.813 | 0.269   | 0.269 | 0.924   | 0.821 |
| 1   | 109856306 | rs464218   | 1p13   | IMPUT  | G   | A   | 0.421   | 0.421 | 0.968   | 0.931 | 0.453   | 0.453 | 0.968   | 0.929 |
| 1   | 109857815 | rs17585355 | 1p13   | GENOT  | A   | C   | 0.970   | 0.030 | 1       | 1     | 0.965   | 0.035 | 1       | 1     |
| 1   | 109858119 | rs370088   | 1p13   | IMPUT  | T   | C   | 0.247   | 0.247 | 0.932   | 0.834 | 0.263   | 0.263 | 0.934   | 0.843 |
| 1   | 109864269 | rs3853500  | 1p13   | IMPUT  | T   | C   | 0.245   | 0.245 | 0.933   | 0.837 | 0.261   | 0.261 | 0.937   | 0.847 |
| 1   | 109866569 | rs3768496  | 1p13   | IMPUT  | T   | A   | 0.249   | 0.249 | 0.981   | 0.948 | 0.267   | 0.267 | 0.983   | 0.954 |
| 1   | 109871787 | rs10745352 | 1p13   | IMPUT  | T   | C   | 0.249   | 0.249 | 0.982   | 0.951 | 0.267   | 0.267 | 0.984   | 0.956 |
| 1   | 109877506 | rs10745353 | 1p13   | IMPUT  | A   | G   | 0.248   | 0.248 | 0.985   | 0.961 | 0.267   | 0.267 | 0.986   | 0.963 |
| 1   | 109879549 | rs4603158  | 1p13   | IMPUT  | C   | T   | 0.248   | 0.248 | 0.987   | 0.964 | 0.266   | 0.266 | 0.988   | 0.966 |
| 1   | 109880721 | rs11102972 | 1p13   | IMPUT  | C   | T   | 0.209   | 0.209 | 0.939   | 0.829 | 0.222   | 0.222 | 0.942   | 0.838 |
| 1   | 109882250 | rs10858084 | 1p13   | IMPUT  | T   | A   | 0.248   | 0.248 | 0.992   | 0.978 | 0.266   | 0.266 | 0.990   | 0.973 |
| 1   | 109884775 | rs2228604  | 1p13   | IMPUT  | T   | G   | 0.247   | 0.247 | 0.995   | 0.986 | 0.266   | 0.266 | 0.996   | 0.990 |
| 1   | 109887191 | rs4970843  | 1p13   | GENOT  | T   | C   | 0.455   | 0.455 | 1       | 1     | 0.502   | 0.498 | 1       | 1     |
| 1   | 109891423 | rs3879448  | 1p13   | GENOT  | G   | C   | 0.255   | 0.255 | 1       | 1     | 0.279   | 0.279 | 1       | 1     |
| 1   | 109894693 | rs7536292  | 1p13   | GENOT  | T   | C   | 0.826   | 0.174 | 1       | 1     | 0.810   | 0.190 | 1       | 1     |
| 1   | 109900707 | rs1030522  | 1p13   | IMPUT  | C   | G   | 0.246   | 0.246 | 0.994   | 0.983 | 0.266   | 0.266 | 0.995   | 0.985 |
| 1   | 109904971 | rs3879449  | 1p13   | IMPUT  | A   | T   | 0.246   | 0.246 | 0.992   | 0.978 | 0.266   | 0.266 | 0.993   | 0.981 |
| 1   | 109910013 | rs11581665 | 1p13   | IMPUT  | T   | C   | 0.135   | 0.135 | 0.994   | 0.973 | 0.145   | 0.145 | 0.995   | 0.978 |
| 1   | 109915075 | rs10858086 | 1p13   | IMPUT  | C   | A   | 0.246   | 0.246 | 0.991   | 0.975 | 0.266   | 0.266 | 0.992   | 0.978 |
| 1   | 109922377 | rs1149175  | 1p13   | GENOT  | A   | G   | 0.134   | 0.134 | 1       | 1     | 0.144   | 0.144 | 1       | 1     |
| 1   | 109923677 | rs12037569 | 1p13   | IMPUT  | G   | T   | 0.863   | 0.137 | 0.907   | 0.661 | 0.851   | 0.149 | 0.893   | 0.651 |
| 1   | 109926828 | rs10858089 | 1p13   | IMPUT  | T   | C   | 0.246   | 0.246 | 0.993   | 0.980 | 0.265   | 0.265 | 0.993   | 0.981 |
| 1   | 109930852 | rs4970752  | 1p13   | IMPUT  | C   | T   | 0.246   | 0.246 | 0.993   | 0.982 | 0.266   | 0.266 | 0.994   | 0.983 |
| 1   | 109931908 | rs10745354 | 1p13   | IMPUT  | C   | T   | 0.246   | 0.246 | 0.994   | 0.982 | 0.266   | 0.266 | 0.994   | 0.983 |
| 1   | 109935427 | rs3768494  | 1p13   | IMPUT  | A   | G   | 0.246   | 0.246 | 0.995   | 0.985 | 0.266   | 0.266 | 0.995   | 0.985 |
| 1   | 109941133 | rs1880670  | 1p13   | IMPUT  | C   | T   | 0.246   | 0.246 | 0.998   | 0.994 | 0.266   | 0.266 | 0.998   | 0.994 |
| 1   | 109943893 | rs10858092 | 1p13   | GENOT  | C   | T   | 0.246   | 0.246 | 1       | 1     | 0.266   | 0.266 | 1       | 1     |
| 1   | 109949008 | rs4120621  | 1p13   | IMPUT  | A   | G   | 0.249   | 0.249 | 0.958   | 0.889 | 0.267   | 0.267 | 0.981   | 0.947 |
| 1   | 222751034 | rs2936033  | 1q41   | IMPUT  | C   | T   | 0.721   | 0.279 | 0.772   | 0.494 | 0.725   | 0.276 | 0.771   | 0.491 |
| 1   | 222759007 | rs3008647  | 1q41   | IMPUT  | C   | T   | 0.841   | 0.159 | 0.973   | 0.902 | 0.841   | 0.159 | 0.976   | 0.913 |
| 1   | 222761771 | rs2270705  | 1q41   | IMPUT  | A   | G   | 0.876   | 0.124 | 0.767   | 0.062 | 0.878   | 0.123 | 0.770   | 0.053 |
| 1   | 222762316 | rs2936027  | 1q41   | IMPUT  | C   | T   | 0.886   | 0.115 | 0.998   | 0.991 | 0.866   | 0.134 | 0.999   | 0.995 |
| 1   | 222762709 | rs17464857 | 1q41   | GENOT  | T   | G   | 0.839   | 0.161 | 1       | 1     | 0.839   | 0.161 | 1       | 1     |
| 1   | 222762773 | rs2936041  | 1q41   | GENOT  | A   | T   | 0.841   | 0.159 | 1       | 1     | 0.839   | 0.161 | 1       | 1     |
| 1   | 222763026 | rs4846767  | 1q41   | IMPUT  | T   | C   | 0.771   | 0.229 | 0.856   | 0.661 | 0.750   | 0.251 | 0.858   | 0.675 |
| 1   | 222763215 | rs3008650  | 1q41   | GENOT  | C   | G   | 0.882   | 0.118 | 1       | 1     | 0.858   | 0.142 | 1       | 1     |
| 1   | 222763661 | rs2936040  | 1q41   | GENOT  | T   | A   | 0.886   | 0.115 | 1       | 1     | 0.866   | 0.134 | 1       | 1     |

|   |           |            |      |       |   |   |       |       |       |       |       |       |       |       |
|---|-----------|------------|------|-------|---|---|-------|-------|-------|-------|-------|-------|-------|-------|
| 1 | 222764791 | rs3008653  | 1q41 | GENOT | C | G | 0.839 | 0.161 | 1     | 1     | 0.839 | 0.161 | 1     | 1     |
| 1 | 222766609 | rs3008654  | 1q41 | IMPUT | G | A | 0.869 | 0.131 | 0.909 | 0.702 | 0.869 | 0.131 | 0.912 | 0.708 |
| 1 | 222769593 | rs1995152  | 1q41 | IMPUT | A | C | 0.886 | 0.115 | 0.998 | 0.988 | 0.866 | 0.134 | 0.998 | 0.991 |
| 1 | 222770703 | rs1909194  | 1q41 | GENOT | A | G | 0.839 | 0.161 | 1     | 1     | 0.839 | 0.161 | 1     | 1     |
| 1 | 222772139 | rs3002130  | 1q41 | GENOT | T | C | 0.839 | 0.162 | 1     | 1     | 0.839 | 0.161 | 1     | 1     |
| 1 | 222788062 | rs3002142  | 1q41 | GENOT | T | C | 0.876 | 0.124 | 1     | 1     | 0.880 | 0.120 | 1     | 1     |
| 1 | 222790366 | rs904323   | 1q41 | IMPUT | G | A | 0.834 | 0.166 | 0.865 | 0.599 | 0.823 | 0.177 | 0.852 | 0.579 |
| 1 | 222795118 | rs17163303 | 1q41 | GENOT | G | T | 0.932 | 0.068 | 1     | 1     | 0.926 | 0.074 | 1     | 1     |
| 1 | 222798965 | rs17011666 | 1q41 | IMPUT | A | G | 0.795 | 0.205 | 0.959 | 0.883 | 0.788 | 0.212 | 0.955 | 0.880 |
| 1 | 222802376 | rs2936052  | 1q41 | IMPUT | A | G | 0.822 | 0.179 | 0.963 | 0.886 | 0.817 | 0.183 | 0.959 | 0.878 |
| 1 | 222804046 | rs3008621  | 1q41 | IMPUT | G | A | 0.856 | 0.144 | 0.996 | 0.984 | 0.846 | 0.155 | 0.997 | 0.989 |
| 1 | 222807013 | rs3002145  | 1q41 | GENOT | C | T | 0.855 | 0.145 | 1     | 1     | 0.845 | 0.155 | 1     | 1     |
| 1 | 222809616 | rs1391557  | 1q41 | IMPUT | C | T | 0.824 | 0.176 | 0.998 | 0.993 | 0.819 | 0.181 | 0.997 | 0.992 |
| 1 | 222813753 | rs2133188  | 1q41 | GENOT | G | T | 0.824 | 0.176 | 1     | 1     | 0.818 | 0.182 | 1     | 1     |
| 1 | 222814442 | rs2133189  | 1q41 | GENOT | T | C | 0.729 | 0.271 | 1     | 1     | 0.716 | 0.284 | 1     | 1     |
| 1 | 222820639 | rs17163358 | 1q41 | GENOT | A | G | 0.729 | 0.271 | 1     | 1     | 0.717 | 0.283 | 1     | 1     |
| 1 | 222821709 | rs17531063 | 1q41 | IMPUT | T | G | 0.933 | 0.068 | 1.000 | 0.997 | 0.927 | 0.073 | 1.000 | 0.997 |
| 1 | 222823529 | rs17465637 | 1q41 | GENOT | C | A | 0.731 | 0.269 | 1     | 1     | 0.717 | 0.283 | 1     | 1     |
| 1 | 222825088 | rs17011681 | 1q41 | IMPUT | G | C | 0.730 | 0.270 | 1.000 | 0.999 | 0.716 | 0.284 | 0.999 | 0.998 |
| 1 | 222826481 | rs2291832  | 1q41 | IMPUT | A | G | 0.730 | 0.270 | 0.999 | 0.998 | 0.716 | 0.284 | 0.999 | 0.997 |
| 1 | 222831372 | rs2088514  | 1q41 | IMPUT | A | G | 0.824 | 0.176 | 0.998 | 0.995 | 0.819 | 0.182 | 0.998 | 0.993 |
| 1 | 222832295 | rs2291834  | 1q41 | IMPUT | C | T | 0.730 | 0.270 | 0.998 | 0.996 | 0.716 | 0.284 | 0.998 | 0.995 |
| 1 | 222835222 | rs17163384 | 1q41 | IMPUT | A | C | 0.933 | 0.068 | 0.999 | 0.994 | 0.927 | 0.073 | 0.999 | 0.994 |
| 1 | 222837594 | rs2270707  | 1q41 | GENOT | A | G | 0.797 | 0.203 | 1     | 1     | 0.788 | 0.212 | 1     | 1     |
| 1 | 222839838 | rs1053316  | 1q41 | GENOT | G | A | 0.905 | 0.095 | 1     | 1     | 0.897 | 0.103 | 1     | 1     |
| 1 | 222844840 | rs3008633  | 1q41 | IMPUT | C | T | 0.918 | 0.082 | 0.974 | 0.860 | 0.907 | 0.093 | 0.974 | 0.877 |
| 1 | 222848029 | rs1391558  | 1q41 | IMPUT | T | C | 0.827 | 0.174 | 0.976 | 0.916 | 0.822 | 0.179 | 0.973 | 0.911 |
| 9 | 21902354  | rs756641   | 9p21 | IMPUT | A | C | 0.150 | 0.150 | 0.744 | 0.166 | 0.146 | 0.146 | 0.736 | 0.105 |
| 9 | 21905379  | rs10811634 | 9p21 | IMPUT | T | C | 0.144 | 0.144 | 0.750 | 0.151 | 0.142 | 0.142 | 0.742 | 0.095 |
| 9 | 21909979  | rs16938590 | 9p21 | IMPUT | A | G | 0.938 | 0.062 | 0.887 | 0.183 | 0.942 | 0.058 | 0.889 | 0.111 |
| 9 | 21920346  | rs4977746  | 9p21 | IMPUT | T | C | 0.834 | 0.166 | 0.936 | 0.791 | 0.843 | 0.157 | 0.938 | 0.796 |
| 9 | 21923279  | rs10811638 | 9p21 | IMPUT | A | G | 0.834 | 0.166 | 0.943 | 0.818 | 0.843 | 0.157 | 0.944 | 0.819 |
| 9 | 21925855  | rs7852128  | 9p21 | IMPUT | T | G | 0.823 | 0.177 | 0.972 | 0.912 | 0.834 | 0.167 | 0.974 | 0.915 |
| 9 | 21927913  | rs10965186 | 9p21 | IMPUT | G | A | 0.823 | 0.177 | 0.980 | 0.938 | 0.834 | 0.167 | 0.978 | 0.932 |
| 9 | 21929666  | rs2518713  | 9p21 | GENOT | A | G | 0.824 | 0.176 | 1     | 1     | 0.833 | 0.167 | 1     | 1     |
| 9 | 21930147  | rs7864029  | 9p21 | GENOT | G | C | 0.820 | 0.180 | 1     | 1     | 0.828 | 0.173 | 1     | 1     |
| 9 | 21931896  | rs7869004  | 9p21 | GENOT | G | T | 0.820 | 0.180 | 1     | 1     | 0.828 | 0.173 | 1     | 1     |
| 9 | 21944317  | rs4977750  | 9p21 | IMPUT | A | C | 0.865 | 0.135 | 0.952 | 0.821 | 0.890 | 0.111 | 0.962 | 0.832 |
| 9 | 21946322  | rs2811717  | 9p21 | IMPUT | T | C | 0.869 | 0.131 | 0.974 | 0.909 | 0.896 | 0.104 | 0.985 | 0.933 |
| 9 | 21947957  | rs2811720  | 9p21 | GENOT | C | G | 0.861 | 0.139 | 1     | 1     | 0.890 | 0.110 | 1     | 1     |
| 9 | 21948666  | rs10965197 | 9p21 | GENOT | C | T | 0.604 | 0.396 | 1     | 1     | 0.632 | 0.368 | 1     | 1     |
| 9 | 21953137  | rs10757260 | 9p21 | IMPUT | A | G | 0.596 | 0.405 | 0.994 | 0.989 | 0.645 | 0.355 | 0.993 | 0.986 |
| 9 | 21954953  | rs10757261 | 9p21 | GENOT | G | A | 0.596 | 0.405 | 1     | 1     | 0.645 | 0.355 | 1     | 1     |
| 9 | 21955669  | rs12335941 | 9p21 | IMPUT | A | G | 0.595 | 0.405 | 0.994 | 0.988 | 0.644 | 0.356 | 0.996 | 0.992 |
| 9 | 21958524  | rs1717326  | 9p21 | GENOT | T | C | 0.919 | 0.081 | 1     | 1     | 0.932 | 0.068 | 1     | 1     |
| 9 | 21961866  | rs7041637  | 9p21 | IMPUT | C | A | 0.690 | 0.311 | 0.792 | 0.605 | 0.674 | 0.326 | 0.755 | 0.530 |
| 9 | 21966221  | rs3731257  | 9p21 | IMPUT | G | A | 0.737 | 0.263 | 0.755 | 0.509 | 0.718 | 0.282 | 0.723 | 0.454 |
| 9 | 21970427  | rs2518719  | 9p21 | IMPUT | A | G | 0.851 | 0.149 | 0.977 | 0.923 | 0.837 | 0.163 | 0.965 | 0.889 |
| 9 | 21973422  | rs2811708  | 9p21 | IMPUT | G | T | 0.669 | 0.331 | 0.974 | 0.952 | 0.702 | 0.298 | 0.962 | 0.925 |
| 9 | 21974218  | rs3731239  | 9p21 | IMPUT | G | A | 0.314 | 0.314 | 0.775 | 0.590 | 0.340 | 0.340 | 0.747 | 0.552 |
| 9 | 21983914  | rs3731222  | 9p21 | IMPUT | T | C | 0.855 | 0.145 | 0.991 | 0.968 | 0.841 | 0.159 | 0.987 | 0.958 |
| 9 | 21986218  | rs3731213  | 9p21 | GENOT | C | T | 0.979 | 0.021 | 1     | 1     | 0.991 | 0.009 | 1     | 1     |
| 9 | 21986847  | rs3731211  | 9p21 | IMPUT | A | T | 0.687 | 0.313 | 0.991 | 0.982 | 0.710 | 0.290 | 0.988 | 0.974 |
| 9 | 21987584  | rs3731204  | 9p21 | IMPUT | T | C | 0.855 | 0.145 | 0.993 | 0.977 | 0.841 | 0.159 | 0.989 | 0.965 |
| 9 | 21988896  | rs3731201  | 9p21 | GENOT | T | C | 0.829 | 0.171 | 1     | 1     | 0.867 | 0.134 | 1     | 1     |
| 9 | 21990457  | rs7036656  | 9p21 | IMPUT | T | C | 0.686 | 0.314 | 1.00  | 0.99  | 0.71  | 0.29  | 0.99  | 0.98  |
| 9 | 21991923  | rs2811710  | 9p21 | GENOT | C | T | 0.598 | 0.402 | 1     | 1     | 0.646 | 0.355 | 1     | 1     |
| 9 | 21993964  | rs2811711  | 9p21 | GENOT | T | C | 0.854 | 0.146 | 1     | 1     | 0.835 | 0.165 | 1     | 1     |
| 9 | 21997872  | rs3218020  | 9p21 | IMPUT | A | G | 0.440 | 0.440 | 0.975 | 0.957 | 0.441 | 0.441 | 0.974 | 0.949 |
| 9 | 22000841  | rs3218002  | 9p21 | IMPUT | G | A | 0.875 | 0.125 | 0.996 | 0.983 | 0.906 | 0.094 | 0.994 | 0.974 |
| 9 | 22003223  | rs3217992  | 9p21 | GENOT | T | C | 0.481 | 0.481 | 1     | 1     | 0.474 | 0.474 | 1     | 1     |
| 9 | 22005330  | rs3217986  | 9p21 | GENOT | T | G | 0.927 | 0.073 | 1     | 1     | 0.942 | 0.058 | 1     | 1     |
| 9 | 22006348  | rs974336   | 9p21 | IMPUT | C | T | 0.875 | 0.125 | 0.997 | 0.986 | 0.906 | 0.094 | 0.994 | 0.976 |
| 9 | 22008026  | rs2069422  | 9p21 | IMPUT | T | G | 0.872 | 0.128 | 0.994 | 0.979 | 0.904 | 0.096 | 0.993 | 0.970 |
| 9 | 22009698  | rs2069418  | 9p21 | IMPUT | C | G | 0.657 | 0.343 | 0.992 | 0.985 | 0.606 | 0.394 | 0.991 | 0.985 |
| 9 | 22011477  | rs575427   | 9p21 | GENOT | A | G | 0.920 | 0.081 | 1     | 1     | 0.894 | 0.106 | 1     | 1     |
| 9 | 22013411  | rs10811640 | 9p21 | IMPUT | T | G | 0.534 | 0.467 | 0.995 | 0.992 | 0.513 | 0.487 | 0.993 | 0.988 |
| 9 | 22017836  | rs643319   | 9p21 | GENOT | C | A | 0.620 | 0.380 | 1     | 1     | 0.591 | 0.409 | 1     | 1     |
| 9 | 22018781  | rs7044859  | 9p21 | GENOT | A | T | 0.533 | 0.467 | 1     | 1     | 0.514 | 0.486 | 1     | 1     |
| 9 | 22019129  | rs523096   | 9p21 | GENOT | A | G | 0.662 | 0.338 | 1     | 1     | 0.614 | 0.386 | 1     | 1     |
| 9 | 22019673  | rs518394   | 9p21 | GENOT | G | C | 0.664 | 0.336 | 1     | 1     | 0.615 | 0.386 | 1     | 1     |

|   |          |            |      |       |   |   |       |       |       |       |       |       |       |       |
|---|----------|------------|------|-------|---|---|-------|-------|-------|-------|-------|-------|-------|-------|
| 9 | 22019732 | rs10757264 | 9p21 | GENOT | G | A | 0.580 | 0.420 | 1     | 1     | 0.561 | 0.439 | 1     | 1     |
| 9 | 22023795 | rs10965212 | 9p21 | GENOT | A | T | 0.569 | 0.431 | 1     | 1     | 0.544 | 0.456 | 1     | 1     |
| 9 | 22024351 | rs496892   | 9p21 | GENOT | C | T | 0.378 | 0.378 | 1     | 1     | 0.406 | 0.406 | 1     | 1     |
| 9 | 22025493 | rs10738604 | 9p21 | IMPUT | A | G | 0.460 | 0.460 | 0.991 | 0.980 | 0.458 | 0.458 | 0.993 | 0.982 |
| 9 | 22026834 | rs1591136  | 9p21 | IMPUT | C | G | 0.563 | 0.437 | 0.985 | 0.972 | 0.537 | 0.463 | 0.985 | 0.970 |
| 9 | 22027551 | rs598664   | 9p21 | IMPUT | T | C | 0.875 | 0.125 | 0.995 | 0.983 | 0.906 | 0.094 | 0.995 | 0.979 |
| 9 | 22028801 | rs7049105  | 9p21 | GENOT | G | A | 0.570 | 0.430 | 1     | 1     | 0.544 | 0.456 | 1     | 1     |
| 9 | 22029445 | rs10965215 | 9p21 | GENOT | A | G | 0.563 | 0.438 | 1     | 1     | 0.537 | 0.463 | 1     | 1     |
| 9 | 22029547 | rs564398   | 9p21 | GENOT | T | C | 0.697 | 0.303 | 1     | 1     | 0.642 | 0.359 | 1     | 1     |
| 9 | 22030438 | rs662463   | 9p21 | GENOT | G | A | 0.881 | 0.119 | 1     | 1     | 0.908 | 0.092 | 1     | 1     |
| 9 | 22031005 | rs7865618  | 9p21 | GENOT | A | G | 0.691 | 0.309 | 1     | 1     | 0.635 | 0.365 | 1     | 1     |
| 9 | 22032119 | rs10115049 | 9p21 | IMPUT | G | A | 0.568 | 0.432 | 0.997 | 0.995 | 0.543 | 0.457 | 0.998 | 0.996 |
| 9 | 22033366 | rs2157719  | 9p21 | IMPUT | T | C | 0.691 | 0.309 | 0.997 | 0.993 | 0.634 | 0.366 | 0.996 | 0.992 |
| 9 | 22036112 | rs1008878  | 9p21 | IMPUT | T | G | 0.691 | 0.309 | 0.996 | 0.990 | 0.634 | 0.366 | 0.994 | 0.988 |
| 9 | 22039426 | rs12376000 | 9p21 | IMPUT | C | T | 0.917 | 0.083 | 0.991 | 0.951 | 0.894 | 0.106 | 0.990 | 0.952 |
| 9 | 22041998 | rs17694493 | 9p21 | GENOT | C | G | 0.858 | 0.142 | 1     | 1     | 0.874 | 0.126 | 1     | 1     |
| 9 | 22042086 | rs12352425 | 9p21 | GENOT | G | A | 0.925 | 0.075 | 1     | 1     | 0.940 | 0.060 | 1     | 1     |
| 9 | 22043926 | rs1412829  | 9p21 | IMPUT | A | G | 0.692 | 0.308 | 0.985 | 0.972 | 0.634 | 0.367 | 0.989 | 0.978 |
| 9 | 22045317 | rs1360589  | 9p21 | IMPUT | T | C | 0.691 | 0.309 | 0.988 | 0.979 | 0.636 | 0.364 | 0.993 | 0.987 |
| 9 | 22048683 | rs7028570  | 9p21 | IMPUT | A | G | 0.566 | 0.434 | 0.983 | 0.976 | 0.545 | 0.455 | 0.989 | 0.983 |
| 9 | 22053895 | rs17756311 | 9p21 | GENOT | G | A | 0.895 | 0.105 | 1     | 1     | 0.919 | 0.081 | 1     | 1     |
| 9 | 22054356 | rs17694572 | 9p21 | GENOT | G | A | 0.896 | 0.104 | 1     | 1     | 0.917 | 0.084 | 1     | 1     |
| 9 | 22056499 | rs10120688 | 9p21 | GENOT | A | G | 0.574 | 0.426 | 1     | 1     | 0.554 | 0.446 | 1     | 1     |
| 9 | 22061614 | rs1537378  | 9p21 | IMPUT | G | A | 0.708 | 0.292 | 0.992 | 0.984 | 0.657 | 0.343 | 0.993 | 0.987 |
| 9 | 22062134 | rs1011970  | 9p21 | IMPUT | G | T | 0.817 | 0.184 | 0.983 | 0.955 | 0.856 | 0.144 | 0.981 | 0.946 |
| 9 | 22064465 | rs8181047  | 9p21 | GENOT | G | A | 0.785 | 0.215 | 1     | 1     | 0.750 | 0.250 | 1     | 1     |
| 9 | 22065002 | rs10811647 | 9p21 | IMPUT | G | C | 0.515 | 0.485 | 0.987 | 0.979 | 0.510 | 0.490 | 0.984 | 0.975 |
| 9 | 22067276 | rs10965224 | 9p21 | GENOT | A | T | 0.707 | 0.293 | 1     | 1     | 0.657 | 0.343 | 1     | 1     |
| 9 | 22069144 | rs16905599 | 9p21 | GENOT | G | A | 0.931 | 0.069 | 1     | 1     | 0.943 | 0.057 | 1     | 1     |
| 9 | 22072301 | rs9632884  | 9p21 | GENOT | C | G | 0.623 | 0.377 | 1     | 1     | 0.600 | 0.400 | 1     | 1     |
| 9 | 22072719 | rs10757270 | 9p21 | GENOT | G | A | 0.516 | 0.484 | 1     | 1     | 0.514 | 0.486 | 1     | 1     |
| 9 | 22073334 | rs16923583 | 9p21 | GENOT | T | A | 0.977 | 0.023 | 1     | 1     | 0.989 | 0.011 | 1     | 1     |
| 9 | 22077543 | rs1412832  | 9p21 | IMPUT | T | C | 0.781 | 0.220 | 0.961 | 0.912 | 0.750 | 0.250 | 0.963 | 0.926 |
| 9 | 22081850 | rs6475606  | 9p21 | GENOT | T | C | 0.609 | 0.391 | 1     | 1     | 0.595 | 0.405 | 1     | 1     |
| 9 | 22082340 | rs1547704  | 9p21 | GENOT | G | A | 0.982 | 0.018 | 1     | 1     | 0.987 | 0.013 | 1     | 1     |
| 9 | 22082380 | rs10965228 | 9p21 | GENOT | A | G | 0.911 | 0.089 | 1     | 1     | 0.902 | 0.098 | 1     | 1     |
| 9 | 22083404 | rs1333040  | 9p21 | IMPUT | T | C | 0.687 | 0.313 | 0.984 | 0.969 | 0.687 | 0.314 | 0.987 | 0.974 |
| 9 | 22087473 | rs7857345  | 9p21 | IMPUT | C | T | 0.798 | 0.202 | 0.919 | 0.808 | 0.767 | 0.233 | 0.920 | 0.821 |
| 9 | 22088260 | rs10757272 | 9p21 | GENOT | T | C | 0.591 | 0.409 | 1     | 1     | 0.575 | 0.425 | 1     | 1     |
| 9 | 22098574 | rs4977574  | 9p21 | GENOT | G | A | 0.593 | 0.407 | 1     | 1     | 0.575 | 0.425 | 1     | 1     |
| 9 | 22098619 | rs2891168  | 9p21 | GENOT | G | A | 0.592 | 0.408 | 1     | 1     | 0.575 | 0.425 | 1     | 1     |
| 9 | 22099568 | rs1537371  | 9p21 | IMPUT | A | C | 0.604 | 0.396 | 0.997 | 0.995 | 0.582 | 0.419 | 0.995 | 0.992 |
| 9 | 22102165 | rs7859727  | 9p21 | IMPUT | T | C | 0.594 | 0.406 | 0.997 | 0.994 | 0.576 | 0.424 | 0.996 | 0.993 |
| 9 | 22103813 | rs1333042  | 9p21 | GENOT | G | A | 0.629 | 0.371 | 1     | 1     | 0.603 | 0.397 | 1     | 1     |
| 9 | 22105927 | rs7859362  | 9p21 | IMPUT | C | T | 0.610 | 0.390 | 0.980 | 0.963 | 0.589 | 0.412 | 0.978 | 0.960 |
| 9 | 22106731 | rs1333043  | 9p21 | IMPUT | A | T | 0.610 | 0.390 | 0.979 | 0.959 | 0.588 | 0.412 | 0.977 | 0.957 |
| 9 | 22110131 | rs1412834  | 9p21 | IMPUT | C | T | 0.609 | 0.391 | 0.976 | 0.953 | 0.588 | 0.412 | 0.974 | 0.950 |
| 9 | 22112241 | rs7341786  | 9p21 | IMPUT | C | A | 0.615 | 0.385 | 0.961 | 0.927 | 0.595 | 0.405 | 0.957 | 0.919 |
| 9 | 22114469 | rs10733376 | 9p21 | IMPUT | C | G | 0.611 | 0.389 | 0.969 | 0.944 | 0.590 | 0.410 | 0.965 | 0.936 |
| 9 | 22115026 | rs2383206  | 9p21 | IMPUT | G | A | 0.611 | 0.389 | 0.970 | 0.944 | 0.590 | 0.410 | 0.965 | 0.936 |
| 9 | 22115959 | rs2383207  | 9p21 | IMPUT | G | A | 0.611 | 0.389 | 0.970 | 0.945 | 0.591 | 0.410 | 0.966 | 0.937 |
| 9 | 22119195 | rs1333045  | 9p21 | IMPUT | C | T | 0.586 | 0.414 | 0.962 | 0.931 | 0.558 | 0.442 | 0.965 | 0.937 |
| 9 | 22123766 | rs10738610 | 9p21 | IMPUT | C | A | 0.599 | 0.401 | 0.991 | 0.984 | 0.582 | 0.418 | 0.993 | 0.985 |
| 9 | 22124477 | rs10757278 | 9p21 | IMPUT | G | A | 0.566 | 0.435 | 0.982 | 0.969 | 0.550 | 0.451 | 0.987 | 0.975 |
| 9 | 22125347 | rs1333048  | 9p21 | GENOT | C | A | 0.597 | 0.403 | 1     | 1     | 0.579 | 0.421 | 1     | 1     |
| 9 | 22125503 | rs1333049  | 9p21 | GENOT | C | G | 0.562 | 0.438 | 1     | 1     | 0.548 | 0.452 | 1     | 1     |
| 9 | 22127613 | rs10757281 | 9p21 | IMPUT | C | T | 0.864 | 0.136 | 0.802 | 0.310 | 0.849 | 0.151 | 0.825 | 0.419 |
| 9 | 22128709 | rs12347779 | 9p21 | GENOT | C | G | 0.946 | 0.054 | 1     | 1     | 0.922 | 0.078 | 1     | 1     |
| 9 | 22130065 | rs10965243 | 9p21 | IMPUT | A | G | 0.921 | 0.079 | 0.995 | 0.967 | 0.894 | 0.106 | 0.998 | 0.989 |
| 9 | 22130515 | rs10965245 | 9p21 | GENOT | G | A | 0.921 | 0.079 | 1     | 1     | 0.893 | 0.107 | 1     | 1     |
| 9 | 22131825 | rs2891169  | 9p21 | GENOT | A | G | 0.572 | 0.428 | 1     | 1     | 0.553 | 0.448 | 1     | 1     |
| 9 | 22132076 | rs2383208  | 9p21 | GENOT | A | G | 0.798 | 0.202 | 1     | 1     | 0.799 | 0.201 | 1     | 1     |
| 9 | 22133251 | rs7045889  | 9p21 | GENOT | G | A | 0.334 | 0.334 | 1     | 1     | 0.356 | 0.356 | 1     | 1     |
| 9 | 22133716 | rs10811659 | 9p21 | GENOT | T | C | 0.756 | 0.244 | 1     | 1     | 0.776 | 0.224 | 1     | 1     |
| 9 | 22133984 | rs10757282 | 9p21 | GENOT | T | C | 0.529 | 0.471 | 1     | 1     | 0.522 | 0.479 | 1     | 1     |
| 9 | 22134094 | rs10811661 | 9p21 | GENOT | T | C | 0.803 | 0.197 | 1     | 1     | 0.807 | 0.193 | 1     | 1     |
| 9 | 22134172 | rs10757283 | 9p21 | GENOT | C | T | 0.527 | 0.473 | 1     | 1     | 0.525 | 0.475 | 1     | 1     |
| 9 | 22136489 | rs1333051  | 9p21 | GENOT | A | T | 0.844 | 0.156 | 1     | 1     | 0.842 | 0.158 | 1     | 1     |
| 9 | 22137685 | rs7018475  | 9p21 | GENOT | T | G | 0.700 | 0.300 | 1     | 1     | 0.708 | 0.293 | 1     | 1     |
| 9 | 22138105 | rs11791416 | 9p21 | GENOT | G | A | 0.297 | 0.297 | 1     | 1     | 0.275 | 0.275 | 1     | 1     |
| 9 | 22138762 | rs4977761  | 9p21 | GENOT | T | C | 0.283 | 0.283 | 1     | 1     | 0.305 | 0.305 | 1     | 1     |

|    |          |            |       |       |   |   |       |       |       |       |       |       |       |       |
|----|----------|------------|-------|-------|---|---|-------|-------|-------|-------|-------|-------|-------|-------|
| 9  | 22140224 | rs2065501  | 9p21  | IMPUT | C | A | 0.565 | 0.435 | 0.559 | 0.213 | 0.594 | 0.406 | 0.550 | 0.190 |
| 9  | 22141875 | rs4977577  | 9p21  | IMPUT | C | T | 0.273 | 0.273 | 0.704 | 0.418 | 0.292 | 0.292 | 0.708 | 0.452 |
| 9  | 22143293 | rs7849199  | 9p21  | IMPUT | T | A | 0.703 | 0.297 | 0.916 | 0.804 | 0.714 | 0.287 | 0.946 | 0.873 |
| 9  | 22145694 | rs2065500  | 9p21  | IMPUT | A | G | 0.781 | 0.219 | 0.946 | 0.863 | 0.775 | 0.225 | 0.961 | 0.902 |
| 9  | 22147715 | rs7022662  | 9p21  | GENOT | C | G | 0.778 | 0.222 | 1     | 1     | 0.775 | 0.226 | 1     | 1     |
| 9  | 22148055 | rs12341394 | 9p21  | GENOT | C | T | 0.701 | 0.299 | 1     | 1     | 0.715 | 0.285 | 1     | 1     |
| 9  | 22150261 | rs7856219  | 9p21  | IMPUT | T | C | 0.696 | 0.304 | 0.989 | 0.977 | 0.707 | 0.293 | 0.979 | 0.954 |
| 9  | 22151465 | rs10965256 | 9p21  | GENOT | G | A | 0.926 | 0.074 | 1     | 1     | 0.930 | 0.070 | 1     | 1     |
| 9  | 22153360 | rs7853123  | 9p21  | IMPUT | A | G | 0.448 | 0.448 | 0.891 | 0.821 | 0.459 | 0.459 | 0.887 | 0.807 |
| 9  | 22155709 | rs944802   | 9p21  | IMPUT | C | T | 0.789 | 0.211 | 0.958 | 0.907 | 0.777 | 0.223 | 0.956 | 0.906 |
| 9  | 22157360 | rs7028213  | 9p21  | IMPUT | T | G | 0.695 | 0.305 | 0.972 | 0.939 | 0.709 | 0.291 | 0.967 | 0.928 |
| 9  | 22158168 | rs12238587 | 9p21  | IMPUT | T | A | 0.780 | 0.220 | 0.986 | 0.968 | 0.771 | 0.229 | 0.987 | 0.969 |
| 9  | 22159416 | rs10757288 | 9p21  | IMPUT | C | T | 0.404 | 0.404 | 0.955 | 0.928 | 0.427 | 0.427 | 0.950 | 0.919 |
| 9  | 22161212 | rs7864275  | 9p21  | GENOT | C | T | 0.626 | 0.374 | 1     | 1     | 0.660 | 0.340 | 1     | 1     |
| 9  | 22161494 | rs10965266 | 9p21  | GENOT | T | G | 0.782 | 0.218 | 1     | 1     | 0.774 | 0.226 | 1     | 1     |
| 9  | 22161828 | rs10965267 | 9p21  | GENOT | T | G | 0.917 | 0.083 | 1     | 1     | 0.941 | 0.059 | 1     | 1     |
| 9  | 22164991 | rs10811668 | 9p21  | GENOT | C | A | 0.726 | 0.274 | 1     | 1     | 0.751 | 0.249 | 1     | 1     |
| 9  | 22166769 | rs2779748  | 9p21  | IMPUT | T | C | 0.379 | 0.379 | 0.877 | 0.791 | 0.411 | 0.411 | 0.864 | 0.782 |
| 9  | 22168128 | rs7863846  | 9p21  | GENOT | C | T | 0.708 | 0.292 | 1     | 1     | 0.723 | 0.277 | 1     | 1     |
| 9  | 22168464 | rs828580   | 9p21  | GENOT | A | T | 0.926 | 0.074 | 1     | 1     | 0.949 | 0.051 | 1     | 1     |
| 9  | 22169700 | rs1537377  | 9p21  | GENOT | T | C | 0.635 | 0.365 | 1     | 1     | 0.673 | 0.327 | 1     | 1     |
| 9  | 22170983 | rs954399   | 9p21  | GENOT | C | A | 0.708 | 0.292 | 1     | 1     | 0.728 | 0.272 | 1     | 1     |
| 9  | 22172259 | rs828582   | 9p21  | IMPUT | T | A | 0.615 | 0.385 | 0.953 | 0.909 | 0.655 | 0.345 | 0.955 | 0.915 |
| 9  | 22174712 | rs10965278 | 9p21  | GENOT | G | A | 0.728 | 0.272 | 1     | 1     | 0.733 | 0.267 | 1     | 1     |
| 9  | 22175188 | rs10965279 | 9p21  | GENOT | G | C | 0.931 | 0.069 | 1     | 1     | 0.932 | 0.068 | 1     | 1     |
| 9  | 22176961 | rs10757292 | 9p21  | IMPUT | C | T | 0.963 | 0.037 | 0.937 | 0.243 | 0.969 | 0.031 | 0.944 | 0.186 |
| 9  | 22183781 | rs866666   | 9p21  | IMPUT | C | T | 0.340 | 0.340 | 0.639 | 0.335 | 0.368 | 0.368 | 0.629 | 0.337 |
| 9  | 22184997 | rs2767409  | 9p21  | IMPUT | G | A | 0.627 | 0.373 | 0.649 | 0.369 | 0.653 | 0.347 | 0.646 | 0.342 |
| 9  | 22187074 | rs1095904  | 9p21  | IMPUT | G | T | 0.656 | 0.344 | 0.629 | 0.317 | 0.680 | 0.320 | 0.632 | 0.298 |
| 9  | 22191189 | rs828576   | 9p21  | IMPUT | T | C | 0.341 | 0.341 | 0.631 | 0.315 | 0.367 | 0.367 | 0.622 | 0.321 |
| 9  | 22195820 | rs2219849  | 9p21  | IMPUT | T | C | 0.531 | 0.469 | 0.604 | 0.309 | 0.539 | 0.461 | 0.595 | 0.293 |
| 9  | 22196863 | rs1751449  | 9p21  | IMPUT | A | G | 0.599 | 0.401 | 0.635 | 0.343 | 0.620 | 0.380 | 0.634 | 0.331 |
| 9  | 22198149 | rs12375458 | 9p21  | IMPUT | G | A | 0.898 | 0.102 | 0.812 | 0.115 | 0.904 | 0.096 | 0.819 | 0.085 |
| 10 | 44682973 | rs1482472  | 10q11 | IMPUT | T | C | 0.624 | 0.376 | 0.858 | 0.721 | 0.624 | 0.376 | 0.831 | 0.677 |
| 10 | 44686664 | rs12415866 | 10q11 | IMPUT | A | G | 0.867 | 0.133 | 0.959 | 0.857 | 0.895 | 0.105 | 0.958 | 0.804 |
| 10 | 44688587 | rs7917089  | 10q11 | IMPUT | G | A | 0.868 | 0.132 | 0.963 | 0.881 | 0.899 | 0.101 | 0.960 | 0.819 |
| 10 | 44691241 | rs1623851  | 10q11 | GENOT | A | G | 0.814 | 0.186 | 1     | 1     | 0.836 | 0.165 | 1     | 1     |
| 10 | 44691633 | rs1627329  | 10q11 | GENOT | T | C | 0.813 | 0.187 | 1     | 1     | 0.836 | 0.165 | 1     | 1     |
| 10 | 44693544 | rs10508883 | 10q11 | GENOT | A | C | 0.976 | 0.024 | 1     | 1     | 0.981 | 0.019 | 1     | 1     |
| 10 | 44693742 | rs7900182  | 10q11 | GENOT | T | G | 0.829 | 0.171 | 1     | 1     | 0.807 | 0.193 | 1     | 1     |
| 10 | 44694201 | rs11597731 | 10q11 | GENOT | C | T | 0.822 | 0.178 | 1     | 1     | 0.801 | 0.200 | 1     | 1     |
| 10 | 44695308 | rs7902040  | 10q11 | GENOT | A | G | 0.889 | 0.111 | 1     | 1     | 0.917 | 0.084 | 1     | 1     |
| 10 | 44695862 | rs11238911 | 10q11 | GENOT | G | A | 0.891 | 0.110 | 1     | 1     | 0.917 | 0.083 | 1     | 1     |
| 10 | 44695973 | rs11238913 | 10q11 | GENOT | T | C | 0.667 | 0.333 | 1     | 1     | 0.661 | 0.339 | 1     | 1     |
| 10 | 44696034 | rs2802477  | 10q11 | IMPUT | G | A | 0.418 | 0.418 | 0.781 | 0.665 | 0.419 | 0.419 | 0.775 | 0.660 |
| 10 | 44696352 | rs11594522 | 10q11 | GENOT | G | A | 0.833 | 0.168 | 1     | 1     | 0.808 | 0.192 | 1     | 1     |
| 10 | 44698075 | rs2054620  | 10q11 | IMPUT | T | C | 0.667 | 0.333 | 0.994 | 0.987 | 0.661 | 0.339 | 0.995 | 0.990 |
| 10 | 44699910 | rs11238921 | 10q11 | IMPUT | G | T | 0.667 | 0.333 | 0.991 | 0.980 | 0.662 | 0.339 | 0.992 | 0.983 |
| 10 | 44702681 | rs768676   | 10q11 | GENOT | T | A | 0.938 | 0.062 | 1     | 1     | 0.941 | 0.060 | 1     | 1     |
| 10 | 44705969 | rs3865770  | 10q11 | IMPUT | G | A | 0.832 | 0.168 | 0.990 | 0.960 | 0.807 | 0.193 | 0.991 | 0.972 |
| 10 | 44707598 | rs1482473  | 10q11 | IMPUT | G | C | 0.845 | 0.155 | 0.990 | 0.963 | 0.861 | 0.139 | 0.992 | 0.968 |
| 10 | 44709171 | rs3851257  | 10q11 | IMPUT | G | T | 0.668 | 0.333 | 0.983 | 0.957 | 0.662 | 0.339 | 0.985 | 0.967 |
| 10 | 44712128 | rs12573558 | 10q11 | IMPUT | C | A | 0.818 | 0.182 | 0.978 | 0.927 | 0.797 | 0.203 | 0.982 | 0.948 |
| 10 | 44714402 | rs11238935 | 10q11 | IMPUT | C | T | 0.891 | 0.109 | 0.992 | 0.961 | 0.918 | 0.082 | 0.994 | 0.962 |
| 10 | 44716469 | rs2209067  | 10q11 | IMPUT | G | A | 0.818 | 0.183 | 0.977 | 0.926 | 0.796 | 0.204 | 0.982 | 0.947 |
| 10 | 44729958 | rs1704219  | 10q11 | GENOT | G | C | 0.682 | 0.318 | 1     | 1     | 0.676 | 0.324 | 1     | 1     |
| 10 | 44730995 | rs7907961  | 10q11 | IMPUT | T | C | 0.791 | 0.209 | 0.994 | 0.985 | 0.757 | 0.243 | 0.993 | 0.984 |
| 10 | 44732825 | rs1746043  | 10q11 | IMPUT | T | C | 0.679 | 0.321 | 0.990 | 0.983 | 0.677 | 0.323 | 0.987 | 0.980 |
| 10 | 44734995 | rs647419   | 10q11 | IMPUT | G | A | 0.639 | 0.361 | 0.990 | 0.979 | 0.638 | 0.362 | 0.983 | 0.971 |
| 10 | 44737036 | rs88796    | 10q11 | GENOT | T | C | 0.722 | 0.278 | 1     | 1     | 0.735 | 0.266 | 1     | 1     |
| 10 | 44737246 | rs617019   | 10q11 | GENOT | G | A | 0.886 | 0.114 | 1     | 1     | 0.921 | 0.080 | 1     | 1     |
| 10 | 44737433 | rs17155733 | 10q11 | GENOT | A | G | 0.837 | 0.163 | 1     | 1     | 0.817 | 0.183 | 1     | 1     |
| 10 | 44738688 | rs583489   | 10q11 | GENOT | C | G | 0.876 | 0.124 | 1     | 1     | 0.913 | 0.087 | 1     | 1     |
| 10 | 44739594 | rs676966   | 10q11 | GENOT | C | T | 0.884 | 0.116 | 1     | 1     | 0.919 | 0.081 | 1     | 1     |
| 10 | 44741256 | rs494207   | 10q11 | IMPUT | G | A | 0.876 | 0.124 | 0.999 | 0.994 | 0.913 | 0.087 | 0.998 | 0.987 |
| 10 | 44746395 | rs541483   | 10q11 | IMPUT | A | G | 0.826 | 0.174 | 1.000 | 0.999 | 0.864 | 0.136 | 1.000 | 0.998 |
| 10 | 44747059 | rs535176   | 10q11 | GENOT | C | T | 0.826 | 0.174 | 1     | 1     | 0.864 | 0.136 | 1     | 1     |
| 10 | 44749211 | rs622472   | 10q11 | GENOT | A | C | 0.826 | 0.174 | 1     | 1     | 0.864 | 0.136 | 1     | 1     |
| 10 | 44749708 | rs513391   | 10q11 | GENOT | A | C | 0.826 | 0.174 | 1     | 1     | 0.864 | 0.136 | 1     | 1     |
| 10 | 44749854 | rs11238956 | 10q11 | GENOT | C | T | 0.339 | 0.339 | 1     | 1     | 0.329 | 0.329 | 1     | 1     |
| 10 | 44751910 | rs687175   | 10q11 | GENOT | T | C | 0.827 | 0.173 | 1     | 1     | 0.867 | 0.133 | 1     | 1     |

|    |          |            |       |       |   |   |       |       |       |       |       |       |       |       |
|----|----------|------------|-------|-------|---|---|-------|-------|-------|-------|-------|-------|-------|-------|
| 10 | 44752078 | rs559580   | 10q11 | GENOT | T | C | 0.829 | 0.171 | 1     | 1     | 0.872 | 0.128 | 1     | 1     |
| 10 | 44752118 | rs559469   | 10q11 | GENOT | T | C | 0.826 | 0.174 | 1     | 1     | 0.867 | 0.133 | 1     | 1     |
| 10 | 44752268 | rs2437935  | 10q11 | GENOT | A | G | 0.614 | 0.386 | 1     | 1     | 0.624 | 0.376 | 1     | 1     |
| 10 | 44752330 | rs535949   | 10q11 | GENOT | G | T | 0.828 | 0.172 | 1     | 1     | 0.867 | 0.133 | 1     | 1     |
| 10 | 44752976 | rs671765   | 10q11 | GENOT | A | G | 0.828 | 0.172 | 1     | 1     | 0.867 | 0.133 | 1     | 1     |
| 10 | 44753867 | rs501120   | 10q11 | IMPUT | T | C | 0.828 | 0.173 | 0.999 | 0.997 | 0.867 | 0.133 | 0.999 | 0.996 |
| 10 | 44755104 | rs579058   | 10q11 | IMPUT | A | G | 0.828 | 0.173 | 0.999 | 0.996 | 0.867 | 0.133 | 0.999 | 0.995 |
| 10 | 44756894 | rs604674   | 10q11 | IMPUT | G | T | 0.828 | 0.172 | 0.995 | 0.985 | 0.867 | 0.133 | 0.997 | 0.986 |
| 10 | 44758197 | rs487465   | 10q11 | IMPUT | A | C | 0.828 | 0.172 | 0.995 | 0.984 | 0.867 | 0.133 | 0.997 | 0.986 |
| 10 | 44760887 | rs475926   | 10q11 | IMPUT | T | G | 0.678 | 0.322 | 0.984 | 0.970 | 0.687 | 0.313 | 0.986 | 0.972 |
| 10 | 44773984 | rs1632484  | 10q11 | GENOT | C | T | 0.833 | 0.168 | 1     | 1     | 0.872 | 0.128 | 1     | 1     |
| 10 | 44775824 | rs1746048  | 10q11 | GENOT | C | T | 0.830 | 0.170 | 1     | 1     | 0.868 | 0.132 | 1     | 1     |
| 10 | 44776310 | rs1746049  | 10q11 | GENOT | C | T | 0.832 | 0.168 | 1     | 1     | 0.869 | 0.131 | 1     | 1     |
| 10 | 44778546 | rs1746052  | 10q11 | GENOT | A | C | 0.838 | 0.162 | 1     | 1     | 0.871 | 0.129 | 1     | 1     |
| 10 | 44786364 | rs800314   | 10q11 | IMPUT | A | G | 0.915 | 0.085 | 0.994 | 0.970 | 0.932 | 0.068 | 0.990 | 0.940 |
| 10 | 44791433 | rs11598523 | 10q11 | IMPUT | T | A | 0.841 | 0.160 | 0.995 | 0.983 | 0.812 | 0.188 | 0.992 | 0.979 |
| 10 | 44793299 | rs2505734  | 10q11 | GENOT | T | C | 0.631 | 0.369 | 1     | 1     | 0.655 | 0.345 | 1     | 1     |
| 10 | 44797087 | rs754713   | 10q11 | GENOT | C | T | 0.717 | 0.283 | 1     | 1     | 0.726 | 0.274 | 1     | 1     |
| 10 | 44798482 | rs800320   | 10q11 | GENOT | C | T | 0.956 | 0.044 | 1     | 1     | 0.967 | 0.033 | 1     | 1     |
| 10 | 44801673 | rs800323   | 10q11 | GENOT | A | G | 0.717 | 0.284 | 1     | 1     | 0.724 | 0.276 | 1     | 1     |
| 10 | 44803925 | rs2437934  | 10q11 | GENOT | C | G | 0.632 | 0.368 | 1     | 1     | 0.654 | 0.346 | 1     | 1     |
| 10 | 44810205 | rs11238983 | 10q11 | GENOT | A | G | 0.165 | 0.165 | 1     | 1     | 0.135 | 0.135 | 1     | 1     |
| 10 | 44813738 | rs2146807  | 10q11 | GENOT | C | T | 0.164 | 0.164 | 1     | 1     | 0.139 | 0.139 | 1     | 1     |
| 10 | 44813777 | rs2146808  | 10q11 | GENOT | A | C | 0.959 | 0.041 | 1     | 1     | 0.970 | 0.030 | 1     | 1     |
| 10 | 44814336 | rs7082209  | 10q11 | GENOT | G | A | 0.168 | 0.168 | 1     | 1     | 0.134 | 0.134 | 1     | 1     |
| 10 | 44815048 | rs800310   | 10q11 | GENOT | A | T | 0.232 | 0.232 | 1     | 1     | 0.179 | 0.179 | 1     | 1     |
| 10 | 44815709 | rs2505735  | 10q11 | GENOT | C | A | 0.790 | 0.210 | 1     | 1     | 0.835 | 0.165 | 1     | 1     |
| 10 | 44817419 | rs977754   | 10q11 | GENOT | T | G | 0.803 | 0.197 | 1     | 1     | 0.847 | 0.153 | 1     | 1     |
| 10 | 44818563 | rs812889   | 10q11 | GENOT | C | G | 0.912 | 0.088 | 1     | 1     | 0.936 | 0.064 | 1     | 1     |
| 10 | 44820157 | rs2476351  | 10q11 | IMPUT | T | C | 0.807 | 0.194 | 0.989 | 0.976 | 0.853 | 0.147 | 0.992 | 0.977 |
| 10 | 44821220 | rs11238987 | 10q11 | GENOT | G | A | 0.967 | 0.033 | 1     | 1     | 0.968 | 0.032 | 1     | 1     |
| 10 | 44821387 | rs10508884 | 10q11 | GENOT | C | T | 0.731 | 0.269 | 1     | 1     | 0.711 | 0.289 | 1     | 1     |
| 10 | 44821772 | rs1111259  | 10q11 | GENOT | C | T | 0.887 | 0.113 | 1     | 1     | 0.915 | 0.085 | 1     | 1     |
| 10 | 44823136 | rs2505741  | 10q11 | GENOT | A | G | 0.525 | 0.475 | 1     | 1     | 0.553 | 0.448 | 1     | 1     |
| 10 | 44826376 | rs2028100  | 10q11 | GENOT | G | A | 0.754 | 0.246 | 1     | 1     | 0.728 | 0.272 | 1     | 1     |
| 10 | 44827164 | rs1836982  | 10q11 | GENOT | C | G | 0.787 | 0.214 | 1     | 1     | 0.841 | 0.159 | 1     | 1     |
| 10 | 44828234 | rs982097   | 10q11 | IMPUT | A | G | 0.537 | 0.463 | 0.998 | 0.997 | 0.567 | 0.433 | 0.998 | 0.998 |
| 10 | 44830727 | rs7918046  | 10q11 | GENOT | C | T | 0.705 | 0.296 | 1     | 1     | 0.719 | 0.281 | 1     | 1     |
| 10 | 44831379 | rs11815919 | 10q11 | GENOT | C | T | 0.817 | 0.183 | 1     | 1     | 0.805 | 0.195 | 1     | 1     |
| 10 | 44832884 | rs928565   | 10q11 | GENOT | A | G | 0.490 | 0.490 | 1     | 1     | 0.529 | 0.471 | 1     | 1     |
| 10 | 44833031 | rs11599561 | 10q11 | GENOT | T | C | 0.892 | 0.108 | 1     | 1     | 0.889 | 0.111 | 1     | 1     |
| 10 | 44833894 | rs266080   | 10q11 | GENOT | A | G | 0.978 | 0.022 | 1     | 1     | 0.983 | 0.017 | 1     | 1     |
| 10 | 44835963 | rs1144482  | 10q11 | IMPUT | T | C | 0.477 | 0.477 | 1     | 1     | 0.516 | 0.484 | 1     | 1     |
| 10 | 44837267 | rs1360724  | 10q11 | IMPUT | A | G | 0.682 | 0.318 | 0.999 | 0.999 | 0.698 | 0.303 | 0.999 | 0.998 |
| 10 | 44838019 | rs10900025 | 10q11 | GENOT | A | G | 0.593 | 0.407 | 1     | 1     | 0.603 | 0.398 | 1     | 1     |
| 10 | 44838464 | rs7069891  | 10q11 | GENOT | C | T | 0.891 | 0.109 | 1     | 1     | 0.889 | 0.111 | 1     | 1     |
| 10 | 44838530 | rs77839    | 10q11 | GENOT | A | G | 0.571 | 0.429 | 1     | 1     | 0.586 | 0.414 | 1     | 1     |
| 10 | 44839865 | rs17390084 | 10q11 | GENOT | A | G | 0.042 | 0.042 | 1     | 1     | 0.034 | 0.034 | 1     | 1     |
| 10 | 44842048 | rs10793536 | 10q11 | IMPUT | G | C | 0.562 | 0.438 | 0.996 | 0.993 | 0.582 | 0.418 | 0.993 | 0.989 |
| 10 | 44844381 | rs266076   | 10q11 | IMPUT | A | G | 0.560 | 0.440 | 0.997 | 0.995 | 0.580 | 0.420 | 0.996 | 0.993 |
| 10 | 44848921 | rs1144480  | 10q11 | IMPUT | A | T | 0.462 | 0.462 | 0.979 | 0.965 | 0.502 | 0.498 | 0.988 | 0.979 |
| 10 | 44850424 | rs266109   | 10q11 | GENOT | A | G | 0.878 | 0.122 | 1     | 1     | 0.900 | 0.100 | 1     | 1     |
| 10 | 44851737 | rs1144477  | 10q11 | GENOT | T | C | 0.478 | 0.478 | 1     | 1     | 0.512 | 0.488 | 1     | 1     |
| 10 | 44855663 | rs266105   | 10q11 | GENOT | G | A | 0.862 | 0.139 | 1     | 1     | 0.889 | 0.111 | 1     | 1     |
| 10 | 44855740 | rs11595588 | 10q11 | GENOT | T | C | 0.603 | 0.397 | 1     | 1     | 0.612 | 0.388 | 1     | 1     |
| 10 | 44855927 | rs17391002 | 10q11 | GENOT | A | G | 0.801 | 0.199 | 1     | 1     | 0.767 | 0.233 | 1     | 1     |
| 10 | 44856370 | rs266103   | 10q11 | GENOT | C | T | 0.855 | 0.145 | 1     | 1     | 0.890 | 0.111 | 1     | 1     |
| 10 | 44858840 | rs185545   | 10q11 | IMPUT | G | C | 0.793 | 0.207 | 0.894 | 0.752 | 0.799 | 0.201 | 0.868 | 0.706 |
| 10 | 44861220 | rs7918568  | 10q11 | GENOT | C | T | 0.829 | 0.171 | 1     | 1     | 0.814 | 0.186 | 1     | 1     |
| 10 | 44863434 | rs7915848  | 10q11 | GENOT | T | C | 0.828 | 0.172 | 1     | 1     | 0.816 | 0.184 | 1     | 1     |
| 10 | 44864300 | rs266094   | 10q11 | GENOT | C | T | 0.854 | 0.146 | 1     | 1     | 0.875 | 0.125 | 1     | 1     |
| 10 | 44866208 | rs266093   | 10q11 | IMPUT | G | C | 0.639 | 0.361 | 0.997 | 0.994 | 0.658 | 0.342 | 0.993 | 0.988 |
| 10 | 44867146 | rs1029153  | 10q11 | GENOT | A | G | 0.725 | 0.275 | 1     | 1     | 0.721 | 0.279 | 1     | 1     |
| 10 | 44868257 | rs1801157  | 10q11 | GENOT | T | C | 0.246 | 0.246 | 1     | 1     | 0.215 | 0.215 | 1     | 1     |
| 10 | 44869427 | rs266089   | 10q11 | GENOT | G | A | 0.847 | 0.153 | 1     | 1     | 0.859 | 0.141 | 1     | 1     |
| 10 | 44870015 | rs266088   | 10q11 | GENOT | C | T | 0.853 | 0.147 | 1     | 1     | 0.814 | 0.186 | 1     | 1     |
| 10 | 44871062 | rs266087   | 10q11 | IMPUT | A | G | 0.399 | 0.399 | 0.934 | 0.875 | 0.403 | 0.403 | 0.951 | 0.904 |
| 10 | 44871548 | rs2297630  | 10q11 | IMPUT | G | A | 0.731 | 0.269 | 0.918 | 0.812 | 0.730 | 0.270 | 0.936 | 0.848 |
| 10 | 44875166 | rs2839690  | 10q11 | IMPUT | A | G | 0.833 | 0.167 | 0.927 | 0.759 | 0.824 | 0.176 | 0.922 | 0.750 |
| 10 | 44878713 | rs3780891  | 10q11 | IMPUT | G | A | 0.915 | 0.085 | 0.925 | 0.605 | 0.890 | 0.110 | 0.896 | 0.581 |

---

AI1 and AI2, referenced allele; BP, genomic position in base pair; CHR, chromosome; GENOT, genotyped; IMPUT, imputed; MAF, minor allele frequency; Quality, the average posterior probability for the most likely genotype; Rsq, MACH quality metric (R<sup>2</sup>); SNP, single nucleotide polymorphism.  
SNPs with low imputation quality (R<sup>2</sup><0.3) are highlighted in grey.

Chromosome positions from Genome Reference Consortium human build 37 (GRCh37).
