# Supplementary material for: Analysis of Genomic Regions Associated With Coronary Artery Disease Reveals Continent-Specific Single Nucleotide Polymorphisms in North African Populations
Source: PubMed Central journal article supplement (PMC4848325; doi:10.2188/jea.je20150034), 2016-05-05
Supplement: je-26-264-s002.pdf [file je-26-264-s002.pdf]

**eTable 2.** Case-control allelic frequencies and association parameters adjusted for gender in the genotype and imputed case-control samples

| CHR | SNP        | BP        | Region | Morocco |       |       |       |       |       |       |     |       |       | Tunisia |       |       |       |    |       |       |       |       |       | ATVB  |   |       |       |       |       |       |       |   |       | Region |       |       |       |       |   |  |  |  |  |
|-----|------------|-----------|--------|---------|-------|-------|-------|-------|-------|-------|-----|-------|-------|---------|-------|-------|-------|----|-------|-------|-------|-------|-------|-------|---|-------|-------|-------|-------|-------|-------|---|-------|--------|-------|-------|-------|-------|---|--|--|--|--|
|     |            |           |        | A1      | F     | A     | F     | U     | OR    | L95   | U95 | P     | A1    | F       | A     | F     | U     | OR | L95   | U95   | P     | A1    | F     | A     | F | U     | OR    | L95   | U95   | P     | A1    | F | A     | F      | U     | OR    | L95   | U95   | P |  |  |  |  |
| 1   | rs4970833  | 109804646 | 1p13   | A       | 0.493 | 0.418 | 1.268 | 0.792 | 2.032 | 0.330 | A   | 0.533 | 0.493 | 1.426   | 0.741 | 2.744 | 0.288 | A  | 0.120 | 0.092 | 0.884 | 0.323 | 2.417 | 0.841 | T | 0.084 | 0.096 | 0.868 | 0.735 | 1.025 | 0.096 | T | 0.107 | 0.085  | 1.292 | 0.879 | 1.898 | 0.180 |   |  |  |  |  |
| 1   | rs653635   | 109806313 | 1p13   | G       | 0.069 | 0.214 | 0.257 | 1.110 | 0.598 | 0.003 | G   | 0.120 | 0.092 | 0.884   | 0.323 | 2.417 | 0.841 | T  | 0.084 | 0.096 | 0.868 | 0.735 | 1.025 | 0.096 | T | 0.107 | 0.085 | 1.292 | 0.879 | 1.898 | 0.180 |   |       |        |       |       |       |       |   |  |  |  |  |
| 1   | rs6857811  | 109807283 | 1p13   | T       | 0.142 | 0.085 | 1.828 | 0.746 | 4.483 | 0.208 | T   | 0.076 | 0.112 | 0.550   | 3.453 | 3.196 | 0.912 | T  | 0.084 | 0.096 | 0.868 | 0.735 | 1.025 | 0.096 | T | 0.107 | 0.085 | 1.292 | 0.879 | 1.898 | 0.180 |   |       |        |       |       |       |       |   |  |  |  |  |
| 1   | rs6808196  | 109808117 | 1p13   | A       | 0.028 | 0.082 | 0.317 | 0.089 | 1.129 | 0.055 | A   | 0.098 | 0.033 | 2.188   | 0.585 | 8.188 | 0.243 | T  | 0.084 | 0.096 | 0.868 | 0.735 | 1.025 | 0.096 | T | 0.107 | 0.085 | 1.292 | 0.879 | 1.898 | 0.180 |   |       |        |       |       |       |       |   |  |  |  |  |
| 1   | rs17035630 | 109810981 | 1p13   | A       | 0.070 | 0.122 | 0.589 | 0.250 | 1.390 | 0.253 | A   | 0.098 | 0.072 | 1.031   | 0.386 | 2.752 | 0.981 | T  | 0.084 | 0.096 | 0.868 | 0.735 | 1.025 | 0.096 | T | 0.107 | 0.085 | 1.292 | 0.879 | 1.898 | 0.180 |   |       |        |       |       |       |       |   |  |  |  |  |
| 1   | rs17035665 | 109813719 | 1p13   | T       | 0.220 | 0.167 | 1.324 | 0.695 | 2.563 | 0.386 | T   | 0.174 | 0.224 | 0.866   | 4.01  | 1.873 | 0.718 | T  | 0.084 | 0.096 | 0.868 | 0.735 | 1.025 | 0.096 | T | 0.107 | 0.085 | 1.292 | 0.879 | 1.898 | 0.180 |   |       |        |       |       |       |       |   |  |  |  |  |
| 1   | rs4970834  | 109814880 | 1p13   | T       | 0.215 | 0.229 | 0.228 | 0.519 | 1.659 | 0.777 | T   | 0.087 | 0.197 | 0.314   | 0.118 | 0.835 | 0.020 | T  | 0.121 | 0.143 | 0.831 | 0.721 | 0.956 | 0.013 | T | 0.161 | 0.136 | 1.213 | 0.896 | 1.643 | 0.198 |   |       |        |       |       |       |       |   |  |  |  |  |
| 1   | rs611917   | 109815252 | 1p13   | C       | 0.236 | 0.245 | 0.974 | 0.540 | 1.755 | 0.977 | C   | 0.207 | 0.243 | 0.772   | 0.353 | 1.690 | 0.526 | G  | 0.217 | 0.232 | 0.912 | 0.809 | 1.027 | 0.130 | G | 0.277 | 0.252 | 1.160 | 0.888 | 1.516 | 0.256 |   |       |        |       |       |       |       |   |  |  |  |  |
| 1   | rs12740374 | 109817500 | 1p13   | T       | 0.190 | 0.177 | 1.088 | 0.566 | 2.091 | 0.788 | T   | 0.120 | 0.224 | 0.541   | 0.228 | 1.285 | 0.171 | T  | 0.170 | 0.191 | 0.870 | 0.769 | 0.985 | 0.028 | T | 0.203 | 0.185 | 1.129 | 0.855 | 1.491 | 0.359 |   |       |        |       |       |       |       |   |  |  |  |  |
| 1   | rs629391   | 109818306 | 1p13   | C       | 0.201 | 0.194 | 1.038 | 0.563 | 1.917 | 0.988 | C   | 0.141 | 0.270 | 0.475   | 0.206 | 1.095 | 0.063 | G  | 0.170 | 0.191 | 0.870 | 0.769 | 0.985 | 0.028 | G | 0.203 | 0.185 | 1.129 | 0.855 | 1.491 | 0.359 |   |       |        |       |       |       |       |   |  |  |  |  |
| 1   | rs646776   | 109818530 | 1p13   | C       | 0.201 | 0.194 | 1.038 | 0.563 | 1.917 | 0.988 | C   | 0.141 | 0.270 | 0.475   | 0.206 | 1.095 | 0.063 | G  | 0.170 | 0.191 | 0.870 | 0.769 | 0.985 | 0.028 | G | 0.203 | 0.185 | 1.129 | 0.855 | 1.491 | 0.359 |   |       |        |       |       |       |       |   |  |  |  |  |
| 1   | rs17035849 | 109820919 | 1p13   | G       | 0.118 | 0.114 | 0.592 | 0.274 | 1.246 | 0.148 | G   | 0.065 | 0.105 | 0.601   | 1.922 | 1.364 | 0.364 | G  | 0.053 | 0.052 | 1.020 | 0.826 | 1.261 | 0.863 | G | 0.053 | 0.054 | 1.002 | 0.812 | 1.640 | 0.997 |   |       |        |       |       |       |       |   |  |  |  |  |
| 1   | rs583104   | 109821307 | 1p13   | C       | 0.319 | 0.378 | 0.789 | 0.457 | 1.293 | 0.306 | C   | 0.174 | 0.342 | 0.358   | 1.56  | 0.821 | 0.010 | G  | 0.184 | 0.203 | 0.885 | 0.784 | 0.999 | 0.055 | G | 0.224 | 0.196 | 1.192 | 0.908 | 1.563 | 0.181 |   |       |        |       |       |       |       |   |  |  |  |  |
| 1   | rs602633   | 109821511 | 1p13   | A       | 0.319 | 0.357 | 0.838 | 0.496 | 1.415 | 0.515 | A   | 0.163 | 0.322 | 0.354   | 1.53  | 0.919 | 0.014 | T  | 0.180 | 0.201 | 0.870 | 0.771 | 0.983 | 0.023 | T | 0.223 | 0.191 | 1.213 | 0.925 | 1.591 | 0.151 |   |       |        |       |       |       |       |   |  |  |  |  |
| 1   | rs599839   | 109822166 | 1p13   | G       | 0.319 | 0.367 | 0.805 | 0.480 | 1.351 | 0.403 | G   | 0.174 | 0.336 | 0.365   | 1.59  | 0.837 | 0.011 | G  | 0.184 | 0.202 | 0.892 | 0.790 | 1.007 | 0.073 | G | 0.223 | 0.197 | 1.170 | 0.893 | 1.534 | 0.221 |   |       |        |       |       |       |       |   |  |  |  |  |
| 1   | rs14000    | 109822509 | 1p13   | C       | 0.083 | 0.153 | 0.483 | 0.209 | 1.117 | 0.049 | C   | 0.120 | 0.259 | 0.124   | 0.405 | 3.645 | 0.733 | C  | 0.120 | 0.100 | 1.227 | 1.052 | 1.432 | 0.013 | C | 0.123 | 0.114 | 0.998 | 0.771 | 1.564 | 0.609 |   |       |        |       |       |       |       |   |  |  |  |  |
| 1   | rs672569   | 109822753 | 1p13   | A       | 0.188 | 0.255 | 0.710 | 0.398 | 1.266 | 0.265 | A   | 0.141 | 0.243 | 0.382   | 1.59  | 0.918 | 0.028 | A  | 0.103 | 0.114 | 0.897 | 0.768 | 1.046 | 0.166 | A | 0.124 | 0.110 | 1.152 | 0.814 | 1.630 | 0.390 |   |       |        |       |       |       |       |   |  |  |  |  |
| 1   | rs655246   | 109823283 | 1p13   | A       | 0.493 | 0.490 | 1.034 | 0.621 | 1.724 | 0.897 | A   | 0.500 | 0.513 | 0.874   | 0.457 | 1.670 | 0.676 | A  | 0.354 | 0.365 | 0.949 | 0.853 | 1.056 | 0.313 | A | 0.369 | 0.382 | 0.941 | 0.730 | 1.211 | 0.620 |   |       |        |       |       |       |       |   |  |  |  |  |
| 1   | rs17584208 | 109833187 | 1p13   | T       | 0.049 | 0.051 | 0.974 | 0.288 | 3.294 | 0.979 | T   | 0.033 | 0.066 | 0.357   | 0.080 | 1.585 | 0.151 | A  | 0.044 | 0.043 | 1.014 | 0.802 | 1.281 | 0.921 | A | 0.058 | 0.046 | 1.311 | 0.787 | 1.885 | 0.285 |   |       |        |       |       |       |       |   |  |  |  |  |
| 1   | rs17645031 | 109834938 | 1p13   | T       | 0.049 | 0.051 | 0.974 | 0.288 | 3.294 | 0.979 | T   | 0.033 | 0.066 | 0.357   | 0.080 | 1.585 | 0.151 | T  | 0.044 | 0.043 | 1.014 | 0.802 | 1.281 | 0.921 | T | 0.058 | 0.046 | 1.311 | 0.787 | 1.885 | 0.285 |   |       |        |       |       |       |       |   |  |  |  |  |
| 1   | rs17645143 | 109835757 | 1p13   | C       | 0.236 | 0.235 | 1.022 | 0.559 | 1.869 | 0.885 | C   | 0.304 | 0.224 | 1.529   | 0.747 | 3.131 | 0.233 | C  | 0.228 | 0.218 | 1.067 | 0.946 | 1.204 | 0.300 | C | 0.207 | 0.233 | 0.842 | 0.636 | 1.114 | 0.216 |   |       |        |       |       |       |       |   |  |  |  |  |
| 1   | rs629001   | 109838918 | 1p13   | C       | 0.097 | 0.163 | 0.532 | 0.236 | 1.200 | 0.140 | C   | 0.109 | 0.171 | 0.504   | 0.410 | 2.709 | 0.895 | C  | 0.030 | 0.045 | 0.653 | 0.506 | 0.843 | 0.002 | C | 0.048 | 0.041 | 1.170 | 0.695 | 1.972 | 0.566 |   |       |        |       |       |       |       |   |  |  |  |  |
| 1   | rs3850615  | 109839738 | 1p13   | A       | 0.104 | 0.082 | 1.307 | 0.524 | 3.256 | 0.641 | A   | 0.054 | 0.099 | 0.744   | 0.230 | 2.411 | 0.648 | A  | 0.041 | 0.031 | 1.343 | 1.036 | 1.740 | 0.023 | A | 0.039 | 0.052 | 0.748 | 0.443 | 1.262 | 0.260 |   |       |        |       |       |       |       |   |  |  |  |  |
| 1   | rs600806   | 109840629 | 1p13   | C       | 0.284 | 0.250 | 1.081 | 0.570 | 2.052 | 0.831 | C   | 0.228 | 0.296 | 0.845   | 0.421 | 1.697 | 0.645 | G  | 0.224 | 0.213 | 1.067 | 0.951 | 1.197 | 0.280 | G | 0.257 | 0.222 | 1.217 | 0.933 | 1.589 | 0.147 |   |       |        |       |       |       |       |   |  |  |  |  |
| 1   | rs684034   | 109842271 | 1p13   | G       | 0.285 | 0.255 | 1.193 | 0.649 | 2.194 | 0.553 | G   | 0.261 | 0.283 | 0.944   | 0.473 | 1.985 | 0.871 | C  | 0.255 | 0.238 | 1.093 | 0.979 | 1.221 | 0.114 | C | 0.277 | 0.252 | 1.141 | 0.885 | 1.471 | 0.313 |   |       |        |       |       |       |       |   |  |  |  |  |
| 1   | rs11583969 | 109843775 | 1p13   | T       | 0.063 | 0.092 | 0.599 | 0.217 | 1.656 | 0.291 | T   | 0.022 | 0.038 | 0.335   | 0.056 | 2.017 | 0.236 | T  | 0.054 | 0.044 | 1.229 | 0.988 | 1.529 | 0.068 | T | 0.081 | 0.069 | 1.672 | 0.957 | 2.466 | 0.029 |   |       |        |       |       |       |       |   |  |  |  |  |
| 1   | rs652651   | 109844532 | 1p13   | G       | 0.209 | 0.255 | 0.936 | 0.701 | 2.395 | 0.788 | G   | 0.244 | 0.242 | 0.758   | 0.410 | 2.216 | 0.417 | G  | 0.265 | 0.244 | 1.114 | 0.998 | 1.243 | 0.050 | A | 0.276 | 0.250 | 1.086 | 0.842 | 1.403 | 0.511 |   |       |        |       |       |       |       |   |  |  |  |  |
| 1   | rs407102   | 109846276 | 1p13   | G       | 0.243 | 0.235 | 1.077 | 0.570 | 2.032 | 0.809 | G   | 0.281 | 0.280 | 0.820   | 0.407 | 1.652 | 0.560 | C  | 0.252 | 0.232 | 1.112 | 0.995 | 1.22  | 0.059 | C | 0.266 | 0.251 | 1.085 | 0.840 | 1.401 | 0.536 |   |       |        |       |       |       |       |   |  |  |  |  |
| 1   | rs592107   | 109848726 | 1p13   | T       | 0.257 | 0.214 | 1.314 | 0.691 | 2.499 | 0.371 | T   | 0.261 | 0.296 | 0.811   | 0.405 | 1.825 | 0.502 | A  | 0.252 | 0.232 | 1.112 | 0.995 | 1.22  | 0.059 | A | 0.266 | 0.251 | 1.085 | 0.840 | 1.401 | 0.536 |   |       |        |       |       |       |       |   |  |  |  |  |
| 1   | rs444387   | 109851127 | 1p13   | A       | 0.304 | 0.260 | 1.284 | 0.691 | 2.388 | 0.431 | A   | 0.272 | 0.329 | 0.743   | 0.370 | 1.493 | 0.396 | A  | 0.253 | 0.234 | 1.104 | 0.989 | 1.234 | 0.080 | A | 0.266 | 0.256 | 1.085 | 0.820 | 1.365 | 0.675 |   |       |        |       |       |       |       |   |  |  |  |  |
| 1   | rs464218   | 109856306 | 1p13   | T       | 0.493 | 0.439 | 1.283 | 0.767 | 2.080 | 0.374 | T   | 0.500 | 0.513 | 0.793   | 0.408 | 1.502 | 0.461 | G  | 0.427 | 0.413 | 1.062 | 0.964 | 1.170 | 0.202 | G | 0.452 | 0.459 | 0.969 | 0.770 | 1.218 | 0.181 |   |       |        |       |       |       |       |   |  |  |  |  |
| 1   | rs17585355 | 109857815 | 1p13   | C       | 0.310 | 0.255 | 1.448 | 0.719 | 2.919 | 0.303 | C   | 0.304 | 0.242 | 1.926   | 0.915 | 4.056 | 0.081 | C  | 0.034 | 0.026 | 1.362 | 1.024 | 1.813 | 0.032 | C | 0.031 | 0.039 | 0.786 | 0.440 | 1.403 | 0.410 |   |       |        |       |       |       |       |   |  |  |  |  |
| 1   | rs370088   | 109858119 | 1p13   | T       | 0.264 | 0.214 | 1.348 | 0.718 | 2.531 | 0.354 | T   | 0.261 | 0.296 | 0.811   | 0.405 | 1.625 | 0.502 | T  | 0.252 | 0.234 | 1.103 | 0.987 | 1.232 | 0.087 | T | 0.266 | 0.256 | 1.058 | 0.820 | 1.365 | 0.675 |   |       |        |       |       |       |       |   |  |  |  |  |
| 1   | rs3853500  | 109864269 | 1p13   | A       | 0.292 | 0.255 | 1.236 | 0.671 | 2.277 | 0.460 | A   | 0.272 | 0.329 | 0.743   | 0.370 | 1.493 | 0.396 | T  | 0.251 | 0.232 | 1.111 | 0.994 | 1.242 | 0.061 | T | 0.265 | 0.251 | 1.075 | 0.832 | 1.389 | 0.566 |   |       |        |       |       |       |       |   |  |  |  |  |
| 1   | rs3768496  | 109866569 | 1p13   | A       | 0.257 | 0.214 | 1.314 | 0.691 | 2.499 | 0.371 | A   | 0.261 | 0.296 | 0.811   | 0.405 | 1.625 | 0.502 | T  | 0.258 | 0.236 | 1.121 | 1.004 | 1.252 | 0.042 | T | 0.273 |       |       |       |       |       |   |       |        |       |       |       |       |   |  |  |  |  |

|   |            |          |      |   |       |       |       |       |       |       |   |       |       |       |       |       |       |   |       |       |       |       |       |       |   |       |       |       |       |       |       |
|---|------------|----------|------|---|-------|-------|-------|-------|-------|-------|---|-------|-------|-------|-------|-------|-------|---|-------|-------|-------|-------|-------|-------|---|-------|-------|-------|-------|-------|-------|
| 9 | rs2811711  | 21993964 | 9p21 | C | 0.194 | 0.194 | 0.964 | 0.495 | 1.876 | 0.915 | C | 0.141 | 0.184 | 0.715 | 0.308 | 1.661 | 0.489 | C | 0.155 | 0.138 | 1.144 | 1.000 | 1.310 | 0.049 | C | 0.158 | 0.172 | 0.900 | 0.662 | 1.225 | 0.526 |
| 9 | rs3218020  | 21997872 | 9p21 | T | 0.389 | 0.388 | 0.995 | 0.590 | 1.679 | 0.968 | T | 0.413 | 0.434 | 0.804 | 0.442 | 1.462 | 0.502 | A | 0.467 | 0.420 | 1.211 | 1.099 | 1.333 | 0.001 | A | 0.404 | 0.449 | 1.374 | 1.091 | 1.179 | 0.005 |
| 9 | rs3218002  | 22000841 | 9p21 | T | 0.250 | 0.184 | 1.471 | 0.784 | 2.763 | 0.233 | T | 0.207 | 0.178 | 1.005 | 0.463 | 2.181 | 0.999 | A | 0.131 | 0.119 | 1.113 | 0.963 | 1.288 | 0.151 | A | 0.082 | 0.106 | 0.700 | 0.531 | 1.127 | 0.000 |
| 9 | rs3217992  | 22003223 | 9p21 | A | 0.410 | 0.418 | 0.972 | 0.587 | 1.609 | 0.973 | A | 0.435 | 0.447 | 0.850 | 0.474 | 1.525 | 0.587 | T | 0.502 | 0.458 | 1.192 | 1.084 | 1.312 | 0.001 | T | 0.507 | 0.439 | 1.339 | 1.063 | 1.688 | 0.009 |
| 9 | rs3217986  | 22005330 | 9p21 | C | 0.042 | 0.000 | ##### | 0     | inf   | 0.959 | C | 0.043 | 0.059 | 0.797 | 0.225 | 2.289 | 0.750 | G | 0.068 | 0.079 | 0.847 | 0.703 | 1.022 | 0.091 | G | 0.052 | 0.065 | 0.779 | 0.483 | 1.258 | 0.312 |
| 9 | rs974336   | 22006348 | 9p21 | A | 0.243 | 0.184 | 1.402 | 0.749 | 2.625 | 0.360 | C | 0.207 | 0.178 | 1.005 | 0.463 | 2.181 | 0.999 | T | 0.131 | 0.118 | 1.120 | 0.968 | 1.296 | 0.131 | T | 0.082 | 0.106 | 0.700 | 0.531 | 1.117 | 0.000 |
| 9 | rs2069422  | 22008026 | 9p21 | C | 0.222 | 0.135 | 1.861 | 0.910 | 3.807 | 0.079 | C | 0.174 | 0.138 | 1.019 | 0.422 | 2.349 | 0.956 | G | 0.133 | 0.122 | 1.107 | 0.957 | 1.281 | 0.181 | G | 0.084 | 0.107 | 0.766 | 0.526 | 1.115 | 0.730 |
| 9 | rs2069418  | 22009698 | 9p21 | C | 0.201 | 0.296 | 0.586 | 0.319 | 1.076 | 0.822 | C | 0.294 | 0.211 | 1.864 | 0.942 | 3.688 | 0.072 | G | 0.320 | 0.364 | 0.824 | 0.745 | 0.911 | 0.001 | G | 0.376 | 0.412 | 0.866 | 0.692 | 1.085 | 0.221 |
| 9 | rs575427   | 22011477 | 9p21 | C | 0.076 | 0.115 | 0.618 | 0.242 | 1.578 | 0.288 | C | 0.033 | 0.072 | 0.423 | 0.095 | 1.881 | 0.229 | G | 0.083 | 0.078 | 1.075 | 0.902 | 1.280 | 0.408 | G | 0.100 | 0.112 | 0.883 | 0.613 | 1.217 | 0.509 |
| 9 | rs10811640 | 22013011 | 9p21 | G | 0.438 | 0.429 | 1.035 | 0.620 | 1.728 | 0.812 | G | 0.511 | 0.468 | 1.760 | 0.463 | 2.181 | 0.999 | A | 0.451 | 0.483 | 0.879 | 0.969 | 0.927 | 0.013 | G | 0.457 | 0.517 | 0.781 | 0.629 | 0.979 | 0.056 |
| 9 | rs1684319  | 22017636 | 9p21 | T | 0.382 | 0.216 | 1.275 | 0.467 | 2.118 | 0.349 | T | 0.413 | 0.290 | 1.486 | 0.812 | 3.255 | 0.198 | A | 0.370 | 0.390 | 0.917 | 0.832 | 1.012 | 0.900 | A | 0.387 | 0.434 | 0.819 | 0.649 | 1.032 | 0.088 |
| 9 | rs17044859 | 22018781 | 9p21 | T | 0.438 | 0.429 | 1.035 | 0.620 | 1.728 | 0.812 | T | 0.511 | 0.468 | 1.773 | 0.471 | 2.338 | 0.070 | T | 0.451 | 0.484 | 0.879 | 0.900 | 0.967 | 0.012 | T | 0.457 | 0.517 | 0.813 | 0.629 | 0.979 | 0.035 |
| 9 | rs523096   | 22019129 | 9p21 | C | 0.188 | 0.245 | 0.710 | 0.382 | 1.319 | 0.287 | C | 0.304 | 0.191 | 2.072 | 1.030 | 4.165 | 0.042 | G | 0.317 | 0.361 | 0.821 | 0.742 | 0.909 | 0.001 | G | 0.373 | 0.402 | 0.888 | 0.708 | 1.113 | 0.313 |
| 9 | rs518394   | 22019673 | 9p21 | G | 0.188 | 0.245 | 0.710 | 0.382 | 1.319 | 0.287 | G | 0.294 | 0.191 | 1.981 | 0.987 | 4.077 | 0.065 | C | 0.315 | 0.359 | 0.822 | 0.743 | 0.910 | 0.001 | C | 0.369 | 0.404 | 0.870 | 0.694 | 1.091 | 0.228 |
| 9 | rs10757264 | 22019732 | 9p21 | A | 0.409 | 0.388 | 1.084 | 0.648 | 1.815 | 0.800 | A | 0.424 | 0.342 | 1.360 | 0.736 | 2.515 | 0.321 | A | 0.408 | 0.433 | 0.902 | 0.819 | 0.993 | 0.044 | A | 0.410 | 0.470 | 0.782 | 0.623 | 0.981 | 0.031 |
| 9 | rs10965212 | 22023795 | 9p21 | T | 0.417 | 0.388 | 1.103 | 0.667 | 1.825 | 0.695 | T | 0.446 | 0.347 | 1.423 | 0.782 | 2.592 | 0.250 | T | 0.417 | 0.447 | 0.888 | 0.807 | 0.978 | 0.022 | T | 0.431 | 0.484 | 0.797 | 0.633 | 1.004 | 0.054 |
| 9 | rs496892   | 22024351 | 9p21 | A | 0.382 | 0.323 | 1.239 | 0.744 | 2.064 | 0.391 | A | 0.370 | 0.287 | 1.261 | 0.673 | 2.361 | 0.475 | G | 0.368 | 0.389 | 0.913 | 0.827 | 1.007 | 0.070 | C | 0.382 | 0.432 | 0.805 | 0.637 | 1.017 | 0.065 |
| 9 | rs10739604 | 22025493 | 9p21 | A | 0.319 | 0.367 | 0.816 | 0.468 | 1.421 | 0.490 | A | 0.413 | 0.408 | 0.879 | 0.483 | 1.600 | 0.700 | A | 0.484 | 0.439 | 1.195 | 1.086 | 1.315 | 0.002 | A | 0.495 | 0.421 | 1.366 | 1.085 | 1.719 | 0.065 |
| 9 | rs1591136  | 22026834 | 9p21 | C | 0.417 | 0.388 | 1.103 | 0.667 | 1.825 | 0.695 | C | 0.446 | 0.349 | 1.420 | 0.779 | 2.588 | 0.252 | G | 0.417 | 0.446 | 0.889 | 0.808 | 0.978 | 0.026 | G | 0.431 | 0.484 | 0.797 | 0.633 | 1.004 | 0.054 |
| 9 | rs598664   | 22027551 | 9p21 | G | 0.203 | 0.133 | 1.676 | 0.821 | 3.422 | 0.142 | G | 0.174 | 0.138 | 1.019 | 0.422 | 2.349 | 0.956 | C | 0.129 | 0.120 | 1.094 | 0.945 | 1.267 | 0.219 | C | 0.084 | 0.109 | 0.753 | 0.517 | 1.096 | 1.490 |
| 9 | rs7049105  | 22028801 | 9p21 | A | 0.417 | 0.388 | 1.103 | 0.667 | 1.825 | 0.695 | A | 0.446 | 0.349 | 1.420 | 0.779 | 2.588 | 0.252 | A | 0.415 | 0.447 | 0.881 | 0.801 | 0.969 | 0.016 | A | 0.431 | 0.484 | 0.797 | 0.633 | 1.004 | 0.054 |
| 9 | rs10965215 | 22029445 | 9p21 | A | 0.493 | 0.448 | 1.188 | 0.710 | 1.986 | 0.514 | G | 0.446 | 0.344 | 0.609 | 0.603 | 1.897 | 0.813 | G | 0.422 | 0.455 | 0.876 | 0.797 | 0.964 | 0.010 | G | 0.437 | 0.491 | 0.798 | 0.634 | 1.005 | 0.052 |
| 9 | rs564398   | 22029547 | 9p21 | G | 0.167 | 0.204 | 0.767 | 0.401 | 1.466 | 0.432 | G | 0.239 | 0.171 | 1.703 | 0.803 | 3.610 | 0.162 | C | 0.282 | 0.324 | 0.823 | 0.742 | 0.914 | 0.002 | C | 0.347 | 0.372 | 0.897 | 0.711 | 1.132 | 0.367 |
| 9 | rs562463   | 22030438 | 9p21 | T | 0.211 | 0.133 | 1.126 | 0.872 | 3.640 | 1.035 | T | 0.185 | 0.145 | 1.067 | 0.466 | 2.442 | 0.862 | A | 0.124 | 0.113 | 1.111 | 0.957 | 1.289 | 0.163 | A | 0.079 | 0.106 | 0.733 | 0.500 | 0.703 | 0.129 |
| 9 | rs7868618  | 22031005 | 9p21 | G | 0.167 | 0.214 | 0.716 | 0.375 | 1.367 | 0.307 | G | 0.239 | 0.171 | 1.703 | 0.803 | 3.610 | 0.162 | G | 0.289 | 0.331 | 0.823 | 0.742 | 0.912 | 0.001 | G | 0.352 | 0.380 | 0.886 | 0.703 | 1.117 | 0.312 |
| 9 | rs1015049  | 22031509 | 9p21 | A | 0.479 | 0.490 | 0.936 | 0.557 | 1.603 | 0.933 | A | 0.477 | 0.461 | 0.956 | 0.591 | 1.272 | 0.216 | A | 0.417 | 0.447 | 0.888 | 0.807 | 0.978 | 0.022 | A | 0.432 | 0.504 | 0.802 | 0.637 | 1.010 | 0.065 |
| 9 | rs2157171  | 22033366 | 9p21 | T | 0.236 | 0.204 | 0.767 | 0.401 | 1.466 | 0.432 | T | 0.239 | 0.171 | 1.652 | 0.407 | 3.503 | 0.225 | G | 0.288 | 0.330 | 0.821 | 0.741 | 0.911 | 0.002 | C | 0.350 | 0.382 | 0.875 | 0.694 | 1.102 | 0.263 |
| 9 | rs1008878  | 22036112 | 9p21 | G | 0.167 | 0.225 | 0.692 | 0.369 | 1.298 | 0.240 | G | 0.239 | 0.171 | 1.703 | 0.803 | 3.610 | 0.162 | G | 0.288 | 0.330 | 0.821 | 0.741 | 0.911 | 0.002 | G | 0.350 | 0.382 | 0.875 | 0.694 | 1.102 | 0.263 |
| 9 | rs12376000 | 22039426 | 9p21 | T | 0.076 | 0.133 | 0.532 | 0.224 | 1.267 | 1.175 | T | 0.054 | 0.072 | 0.228 | 0.263 | 2.343 | 0.526 | T | 0.084 | 0.079 | 1.061 | 0.892 | 1.262 | 0.502 | T | 0.100 | 0.110 | 0.895 | 0.620 | 1.294 | 0.567 |
| 9 | rs17694493 | 22041998 | 9p21 | G | 0.215 | 0.125 | 0.962 | 0.444 | 1.470 | 0.688 | G | 0.185 | 0.138 | 1.194 | 0.512 | 2.758 | 0.691 | G | 0.147 | 0.138 | 1.080 | 0.941 | 1.241 | 0.254 | G | 0.118 | 0.136 | 0.853 | 0.612 | 1.189 | 0.357 |
| 9 | rs12352425 | 22042086 | 9p21 | A | 0.069 | 0.041 | 1.821 | 0.533 | 6.220 | 0.340 | A | 0.065 | 0.112 | 0.707 | 0.246 | 2.031 | 0.528 | A | 0.070 | 0.081 | 0.855 | 0.711 | 1.028 | 0.101 | A | 0.052 | 0.069 | 0.726 | 0.455 | 1.159 | 0.187 |
| 9 | rs1412829  | 22043926 | 9p21 | C | 0.167 | 0.214 | 0.716 | 0.375 | 1.367 | 0.307 | C | 0.239 | 0.171 | 1.703 | 0.803 | 3.610 | 0.162 | G | 0.286 | 0.327 | 0.827 | 0.745 | 0.917 | 0.003 | G | 0.352 | 0.383 | 0.875 | 0.694 | 1.102 | 0.250 |
| 9 | rs1360589  | 22045317 | 9p21 | G | 0.160 | 0.174 | 0.870 | 0.448 | 1.689 | 0.686 | G | 0.228 | 0.165 | 1.648 | 0.776 | 3.498 | 0.205 | C | 0.288 | 0.329 | 0.828 | 0.746 | 0.917 | 0.003 | C | 0.347 | 0.383 | 0.858 | 0.681 | 1.079 | 0.190 |
| 9 | rs7028570  | 22046863 | 9p21 | A | 0.500 | 0.500 | 1.007 | 0.610 | 1.665 | 0.926 | G | 0.435 | 0.421 | 1.057 | 0.594 | 1.879 | 0.915 | G | 0.418 | 0.448 | 0.887 | 0.806 | 0.976 | 0.017 | G | 0.429 | 0.483 | 0.799 | 0.636 | 1.005 | 0.055 |
| 9 | rs17756311 | 22053895 | 9p21 | A | 0.215 | 0.122 | 1.975 | 0.953 | 4.092 | 0.066 | A | 0.174 | 0.138 | 1.019 | 0.422 | 2.349 | 0.956 | A | 0.110 | 0.100 | 1.113 | 0.952 | 1.301 | 0.194 | A | 0.074 | 0.088 | 0.831 | 0.557 | 1.240 | 0.395 |
| 9 | rs17684572 | 22054356 | 9p21 | A | 0.215 | 0.122 | 1.975 | 0.953 | 4.092 | 0.066 | A | 0.174 | 0.138 | 1.019 | 0.422 | 2.349 | 0.956 | A | 0.111 | 0.098 | 1.140 | 0.974 | 1.333 | 0.103 | A | 0.077 | 0.090 | 0.852 | 0.574 | 1.265 | 0.464 |
| 9 | rs10120688 | 22056499 | 9p21 | A | 0.500 | 0.480 | 1.102 | 0.655 | 1.855 | 0.711 | G | 0.457 | 0.428 | 1.066 | 0.609 | 1.868 | 0.803 | G | 0.410 | 0.442 | 0.881 | 0.801 | 0.970 | 0.016 | G | 0.431 | 0.464 | 0.871 | 0.693 | 1.095 | 0.243 |
| 9 | rs1537378  | 22061614 | 9p21 | T | 0.155 | 0.174 | 0.846 | 0.435 | 1.646 | 0.629 | T | 0.228 | 0.165 | 1.648 | 0.776 | 3.498 | 0.205 | A | 0.268 | 0.312 | 0.811 | 0.730 | 0.900 | 0.001 | A | 0.319 | 0.366 | 0.821 | 0.652 | 1.034 | 0.098 |
| 9 | rs1011970  | 22062134 | 9p21 | T | 0.299 | 0.174 | 2.155 | 1.106 | 4.198 | 0.021 | T | 0.261 | 0.243 | 0.923 | 0.485 | 1.755 | 0.822 | T | 0.184 | 0.181 | 1.023 | 0.903 | 1.159 | 0.710 | T | 0.129 | 0.159 | 0.786 | 0.576 | 1.073 | 0.128 |
| 9 | rs818047   | 22064465 | 9p21 | A | 0.090 | 0.071 | 1.218 | 0.466 | 3.180 | 0.701 | A | 0.185 | 0.099 | 2.574 | 1.020 | 6.499 | 0.041 | A | 0.192 | 0.239 | 0.764 | 0.680 | 0.858 | 0.001 | A | 0.236 | 0.265 | 0.860 | 0.668 | 1.017 | 0.259 |
| 9 | rs10811647 | 22065002 | 9p21 | G | 0.431 | 0.459 | 0.968 | 0.557 | 1.539 | 0.743 | G |       |       |       |       |       |       |   |       |       |       |       |       |       |   |       |       |       |       |       |       |

|    |            |          |       |   |       |       |       |       |       |       |   |       |       |       |       |       |       |   |       |       |       |       |       |       |   |       |       |       |       |       |       |
|----|------------|----------|-------|---|-------|-------|-------|-------|-------|-------|---|-------|-------|-------|-------|-------|-------|---|-------|-------|-------|-------|-------|-------|---|-------|-------|-------|-------|-------|-------|
| 10 | rs2802477  | 44696034 | 10q11 | C | 0.354 | 0.427 | 0.720 | 0.417 | 1.242 | 0.273 | C | 0.391 | 0.401 | 1.088 | 0.610 | 1.940 | 0.796 | G | 0.428 | 0.417 | 1.052 | 0.950 | 1.165 | 0.321 | G | 0.416 | 0.424 | 0.963 | 0.762 | 1.218 | 0.739 |
| 10 | rs11594522 | 44696352 | 10q11 | A | 0.139 | 0.102 | 1.397 | 0.622 | 3.134 | 0.423 | A | 0.141 | 0.105 | 1.991 | 0.710 | 5.584 | 0.184 | A | 0.170 | 0.165 | 1.039 | 0.914 | 1.179 | 0.546 | A | 0.205 | 0.181 | 1.153 | 0.877 | 1.516 | 0.338 |
| 10 | rs2054620  | 44698075 | 10q11 | C | 0.354 | 0.265 | 1.534 | 0.853 | 2.760 | 0.169 | C | 0.304 | 0.283 | 1.007 | 0.527 | 1.923 | 0.988 | C | 0.324 | 0.343 | 0.914 | 0.825 | 1.012 | 0.663 | C | 0.350 | 0.328 | 0.998 | 0.874 | 1.383 | 0.428 |
| 10 | rs11238921 | 44699100 | 10q11 | T | 0.354 | 0.262 | 1.534 | 0.853 | 2.760 | 0.169 | T | 0.304 | 0.263 | 1.110 | 0.573 | 2.132 | 0.772 | T | 0.323 | 0.343 | 0.911 | 0.822 | 1.010 | 0.660 | T | 0.350 | 0.328 | 0.998 | 0.874 | 1.383 | 0.428 |
| 10 | rs768676   | 44702681 | 10q11 | A | 0.076 | 0.092 | 0.849 | 0.355 | 2.031 | 0.814 | A | 0.120 | 0.105 | 1.065 | 0.428 | 2.651 | 0.848 | A | 0.067 | 0.058 | 1.166 | 0.956 | 1.423 | 0.125 | A | 0.056 | 0.063 | 0.880 | 0.547 | 1.148 | 0.585 |
| 10 | rs3865770  | 44705969 | 10q11 | T | 0.139 | 0.102 | 1.397 | 0.622 | 3.134 | 0.423 | T | 0.141 | 0.105 | 1.991 | 0.710 | 5.584 | 0.184 | A | 0.170 | 0.165 | 1.039 | 0.914 | 1.179 | 0.546 | A | 0.205 | 0.181 | 1.153 | 0.877 | 1.516 | 0.338 |
| 10 | rs1482473  | 44707598 | 10q11 | C | 0.160 | 0.143 | 1.090 | 0.515 | 2.307 | 0.819 | C | 0.109 | 0.158 | 0.496 | 0.213 | 1.158 | 1.009 | C | 0.144 | 0.166 | 0.847 | 0.743 | 0.967 | 0.616 | C | 0.137 | 0.139 | 0.887 | 0.711 | 0.969 | 0.952 |
| 10 | rs3851257  | 44709171 | 10q11 | T | 0.229 | 0.167 | 1.390 | 0.739 | 2.939 | 0.356 | T | 0.163 | 0.204 | 0.656 | 0.343 | 1.257 | 0.220 | T | 0.323 | 0.343 | 0.912 | 0.823 | 1.011 | 0.659 | T | 0.347 | 0.330 | 0.977 | 0.857 | 1.354 | 0.330 |
| 10 | rs12573558 | 44712128 | 10q11 | A | 0.139 | 0.102 | 1.397 | 0.622 | 3.134 | 0.423 | A | 0.141 | 0.105 | 1.991 | 0.710 | 5.584 | 0.184 | A | 0.170 | 0.178 | 1.005 | 0.887 | 1.138 | 0.924 | A | 0.210 | 0.191 | 1.118 | 0.854 | 1.467 | 0.442 |
| 10 | rs11239359 | 44714402 | 10q11 | T | 0.099 | 0.122 | 0.736 | 0.927 | 1.658 | 0.461 | T | 0.065 | 0.099 | 0.373 | 0.125 | 1.117 | 0.071 | T | 0.069 | 0.119 | 0.815 | 0.699 | 0.950 | 0.006 | T | 0.087 | 0.077 | 1.050 | 0.783 | 1.732 | 0.487 |
| 10 | rs2209067  | 44716469 | 10q11 | A | 0.207 | 0.142 | 1.571 | 0.775 | 3.179 | 0.188 | A | 0.196 | 0.132 | 1.801 | 0.785 | 4.132 | 0.150 | A | 0.179 | 0.179 | 1.001 | 0.894 | 1.134 | 0.981 | A | 0.211 | 0.191 | 1.130 | 0.882 | 1.481 | 0.406 |
| 10 | rs1704219  | 44729958 | 10q11 | C | 0.347 | 0.255 | 1.527 | 0.848 | 2.752 | 0.182 | C | 0.294 | 0.276 | 0.978 | 0.513 | 1.885 | 0.909 | C | 0.308 | 0.328 | 0.912 | 0.821 | 1.012 | 0.688 | C | 0.336 | 0.314 | 1.00  | 0.872 | 1.388 | 0.431 |
| 10 | rs7907196  | 44730985 | 10q11 | C | 0.243 | 0.133 | 2.166 | 1.054 | 4.451 | 0.044 | C | 0.228 | 0.178 | 1.589 | 0.750 | 3.365 | 0.259 | C | 0.209 | 0.209 | 0.998 | 0.887 | 1.124 | 0.966 | C | 0.248 | 0.237 | 1.062 | 0.824 | 1.369 | 0.632 |
| 10 | rs1746043  | 44732825 | 10q11 | C | 0.347 | 0.255 | 1.527 | 0.848 | 2.752 | 0.182 | C | 0.294 | 0.276 | 0.978 | 0.513 | 1.885 | 0.909 | C | 0.310 | 0.333 | 0.895 | 0.807 | 0.994 | 0.026 | C | 0.336 | 0.312 | 1.08  | 0.878 | 1.368 | 0.421 |
| 10 | rs647419   | 44734985 | 10q11 | T | 0.347 | 0.276 | 1.412 | 0.779 | 2.558 | 0.264 | T | 0.272 | 0.250 | 1.365 | 0.679 | 2.741 | 0.395 | A | 0.353 | 0.372 | 0.919 | 0.831 | 1.016 | 0.075 | A | 0.373 | 0.350 | 1.101 | 0.875 | 1.384 | 0.430 |
| 10 | rs89796    | 44737036 | 10q11 | C | 0.319 | 0.255 | 1.312 | 0.737 | 2.335 | 0.370 | C | 0.250 | 0.237 | 0.938 | 0.469 | 1.875 | 0.854 | C | 0.267 | 0.290 | 0.889 | 0.797 | 0.990 | 0.021 | C | 0.284 | 0.249 | 1.193 | 0.930 | 1.530 | 0.200 |
| 10 | rs617019   | 44737246 | 10q11 | T | 0.090 | 0.112 | 0.700 | 0.927 | 1.717 | 0.504 | T | 0.065 | 0.105 | 0.367 | 0.123 | 1.092 | 0.059 | A | 0.103 | 0.127 | 0.792 | 0.681 | 0.921 | 0.003 | A | 0.084 | 0.076 | 1.127 | 0.745 | 1.705 | 0.560 |
| 10 | rs11755733 | 44737433 | 10q11 | G | 0.194 | 0.122 | 1.589 | 0.781 | 3.232 | 0.214 | G | 0.185 | 0.132 | 1.829 | 0.747 | 4.478 | 0.177 | G | 0.163 | 0.162 | 1.005 | 0.883 | 1.143 | 0.951 | G | 0.197 | 0.170 | 1.188 | 0.894 | 1.578 | 0.263 |
| 10 | rs583489   | 44738688 | 10q11 | C | 0.208 | 0.184 | 1.129 | 0.597 | 2.136 | 0.725 | C | 0.120 | 0.132 | 0.643 | 0.288 | 1.433 | 0.254 | G | 0.111 | 0.138 | 0.779 | 0.673 | 0.902 | 0.003 | G | 0.090 | 0.084 | 1.099 | 0.736 | 1.641 | 0.648 |
| 10 | rs676966   | 44739594 | 10q11 | A | 0.111 | 0.133 | 0.763 | 0.347 | 1.677 | 0.517 | A | 0.065 | 0.118 | 0.356 | 0.127 | 1.097 | 0.046 | T | 0.105 | 0.127 | 0.803 | 0.691 | 0.934 | 0.005 | T | 0.087 | 0.076 | 1.175 | 0.779 | 1.773 | 0.437 |
| 10 | rs494207   | 44741256 | 10q11 | T | 0.208 | 0.184 | 1.129 | 0.597 | 2.136 | 0.725 | T | 0.120 | 0.132 | 0.643 | 0.288 | 1.433 | 0.254 | A | 0.111 | 0.138 | 0.779 | 0.672 | 0.902 | 0.003 | A | 0.092 | 0.084 | 1.121 | 0.752 | 1.672 | 0.570 |
| 10 | rs541483   | 44746395 | 10q11 | C | 0.208 | 0.235 | 0.834 | 0.449 | 1.552 | 0.538 | C | 0.163 | 0.158 | 0.780 | 0.364 | 1.674 | 0.508 | G | 0.159 | 0.189 | 0.809 | 0.712 | 0.918 | 0.002 | G | 0.139 | 0.134 | 1.049 | 0.751 | 1.465 | 0.768 |
| 10 | rs355176   | 44747059 | 10q11 | A | 0.264 | 0.276 | 0.930 | 0.527 | 1.641 | 0.792 | A | 0.163 | 0.171 | 0.718 | 0.345 | 1.496 | 0.365 | T | 0.159 | 0.189 | 0.809 | 0.712 | 0.918 | 0.002 | T | 0.139 | 0.134 | 1.049 | 0.751 | 1.465 | 0.768 |
| 10 | rs622472   | 44749211 | 10q11 | G | 0.261 | 0.276 | 0.917 | 0.520 | 1.618 | 0.775 | G | 0.163 | 0.171 | 0.718 | 0.345 | 1.496 | 0.365 | C | 0.159 | 0.189 | 0.809 | 0.712 | 0.918 | 0.002 | C | 0.139 | 0.134 | 1.049 | 0.751 | 1.465 | 0.768 |
| 10 | rs13391    | 44749708 | 10q11 | G | 0.264 | 0.276 | 0.930 | 0.527 | 1.641 | 0.792 | G | 0.163 | 0.171 | 0.718 | 0.345 | 1.496 | 0.365 | C | 0.159 | 0.189 | 0.807 | 0.710 | 0.917 | 0.002 | C | 0.139 | 0.134 | 1.049 | 0.751 | 1.465 | 0.768 |
| 10 | rs11239356 | 44749854 | 10q11 | C | 0.299 | 0.327 | 0.896 | 0.520 | 1.542 | 0.703 | C | 0.304 | 0.322 | 0.984 | 0.516 | 1.675 | 0.920 | C | 0.348 | 0.329 | 1.085 | 0.981 | 1.200 | 0.095 | C | 0.311 | 0.345 | 0.860 | 0.691 | 1.085 | 0.226 |
| 10 | rs687175   | 44751910 | 10q11 | G | 0.264 | 0.276 | 0.930 | 0.527 | 1.641 | 0.792 | G | 0.163 | 0.171 | 0.718 | 0.345 | 1.496 | 0.365 | C | 0.157 | 0.188 | 0.802 | 0.706 | 0.911 | 0.002 | C | 0.134 | 0.133 | 1.018 | 0.727 | 1.426 | 0.918 |
| 10 | rs559580   | 44752078 | 10q11 | C | 0.204 | 0.235 | 0.818 | 0.439 | 1.522 | 0.523 | C | 0.156 | 0.158 | 0.750 | 0.348 | 1.618 | 0.464 | C | 0.155 | 0.187 | 0.794 | 0.698 | 0.903 | 0.002 | C | 0.129 | 0.128 | 1.017 | 0.722 | 1.432 | 0.931 |
| 10 | rs559469   | 44752118 | 10q11 | G | 0.264 | 0.276 | 0.930 | 0.527 | 1.641 | 0.792 | G | 0.163 | 0.171 | 0.718 | 0.345 | 1.496 | 0.365 | C | 0.159 | 0.189 | 0.808 | 0.711 | 0.918 | 0.002 | C | 0.134 | 0.133 | 1.018 | 0.727 | 1.426 | 0.918 |
| 10 | rs2437935  | 44752268 | 10q11 | C | 0.465 | 0.449 | 1.047 | 0.630 | 1.738 | 0.891 | C | 0.457 | 0.421 | 1.093 | 0.590 | 2.024 | 0.773 | G | 0.378 | 0.395 | 0.933 | 0.845 | 1.030 | 0.162 | G | 0.387 | 0.368 | 1.091 | 0.866 | 1.375 | 0.478 |
| 10 | rs355949   | 44752330 | 10q11 | A | 0.271 | 0.271 | 0.992 | 0.566 | 1.738 | 0.956 | A | 0.163 | 0.187 | 0.706 | 0.344 | 1.447 | 0.339 | T | 0.157 | 0.188 | 0.803 | 0.707 | 0.913 | 0.002 | T | 0.134 | 0.133 | 1.018 | 0.727 | 1.426 | 0.918 |
| 10 | rs671765   | 44752976 | 10q11 | C | 0.264 | 0.265 | 0.981 | 0.556 | 1.732 | 0.911 | C | 0.163 | 0.171 | 0.718 | 0.345 | 1.496 | 0.365 | G | 0.157 | 0.188 | 0.803 | 0.707 | 0.913 | 0.002 | G | 0.134 | 0.133 | 1.018 | 0.727 | 1.426 | 0.918 |
| 10 | rs501120   | 44753867 | 10q11 | G | 0.268 | 0.276 | 0.946 | 0.536 | 1.671 | 0.847 | G | 0.163 | 0.171 | 0.718 | 0.345 | 1.496 | 0.365 | C | 0.157 | 0.188 | 0.803 | 0.707 | 0.913 | 0.002 | C | 0.134 | 0.133 | 1.018 | 0.727 | 1.426 | 0.918 |
| 10 | rs579058   | 44755104 | 10q11 | C | 0.264 | 0.276 | 0.930 | 0.527 | 1.641 | 0.792 | C | 0.163 | 0.178 | 0.678 | 0.334 | 1.378 | 0.283 | G | 0.157 | 0.188 | 0.803 | 0.707 | 0.913 | 0.002 | G | 0.134 | 0.133 | 1.018 | 0.727 | 1.426 | 0.918 |
| 10 | rs604674   | 44756894 | 10q11 | A | 0.264 | 0.276 | 0.930 | 0.527 | 1.641 | 0.792 | A | 0.163 | 0.178 | 0.678 | 0.334 | 1.378 | 0.283 | T | 0.157 | 0.188 | 0.803 | 0.707 | 0.913 | 0.002 | T | 0.134 | 0.133 | 1.018 | 0.727 | 1.426 | 0.918 |
| 10 | rs487465   | 44758197 | 10q11 | G | 0.264 | 0.276 | 0.930 | 0.527 | 1.641 | 0.792 | G | 0.163 | 0.178 | 0.678 | 0.334 | 1.378 | 0.283 | C | 0.157 | 0.188 | 0.803 | 0.707 | 0.913 | 0.002 | C | 0.134 | 0.133 | 1.018 | 0.727 | 1.426 | 0.918 |
| 10 | rs475926   | 44760887 | 10q11 | C | 0.380 | 0.354 | 1.078 | 0.623 | 1.866 | 0.783 | C | 0.294 | 0.273 | 0.951 | 0.497 | 1.818 | 0.875 | G | 0.309 | 0.334 | 0.890 | 0.803 | 0.987 | 0.025 | G | 0.329 | 0.303 | 1.128 | 0.892 | 1.427 | 0.338 |
| 10 | rs1632484  | 44773984 | 10q11 | A | 0.229 | 0.255 | 0.843 | 0.467 | 1.523 | 0.593 | A | 0.163 | 0.171 | 0.687 | 0.337 | 1.399 | 0.302 | T | 0.152 | 0.183 | 0.799 | 0.703 | 0.910 | 0.002 | T | 0.131 | 0.126 | 1.048 | 0.744 | 1.476 | 0.801 |
| 10 | rs1746048  | 44775824 | 10q11 | T | 0.264 | 0.276 | 0.930 | 0.527 | 1.641 | 0.792 | T | 0.163 | 0.171 | 0.687 | 0.337 | 1.399 | 0.302 | T | 0.154 | 0.186 | 0.797 | 0.701 | 0.906 | 0.002 | T | 0.132 | 0.133 | 1.003 | 0.716 | 1.406 | 0.985 |
| 10 | rs1746049  | 44776310 | 10q11 | T | 0.264 | 0.276 | 0.930 | 0.527 | 1.641 | 0.792 | T | 0.163 | 0.171 | 0.687 | 0.337 | 1.399 | 0.302 | T | 0.152 | 0.183 | 0.800 | 0.703 | 0.910 | 0.002 | T | 0.132 | 0.131 | 1.018 | 0.727 | 1.427 | 0.923 |
| 10 | rs1746052  | 44778546 | 10q11 |   |       |       |       |       |       |       |   |       |       |       |       |       |       |   |       |       |       |       |       |       |   |       |       |       |       |       |       |
