# Supplementary material for: Analysis of Genomic Regions Associated With Coronary Artery Disease Reveals Continent-Specific Single Nucleotide Polymorphisms in North African Populations
Source: PubMed Central journal article supplement (PMC4848325; doi:10.2188/jea.je20150034), 2016-05-05
Supplement: je-26-264-s003.pdf [file je-26-264-s003.pdf]

**eTable 3.** Genomic location of the 6 North African SNPs used to calculate the risk score in the case-control samples

| Region | Position | SNP       |
|--------|----------|-----------|
| 9p21   | 22136489 | rs1333051 |
| 9p21   | 22191189 | rs828576  |
| 10q11  | 44730995 | rs7907961 |
| 10q11  | 44786364 | rs800314  |
| 10q11  | 44856370 | rs266103  |
| 10q11  | 44861220 | rs7918568 |

SNP, single nucleotide polymorphism.
