# Supplementary material for: Analysis of Genomic Regions Associated With Coronary Artery Disease Reveals Continent-Specific Single Nucleotide Polymorphisms in North African Populations
Source: PubMed Central journal article supplement (PMC4848325; doi:10.2188/jea.je20150034), 2016-05-05
Supplement: je-26-264-s004.pdf [file je-26-264-s004.pdf]

- **Samples and Markers used**
- **Association Analysis**
- **LD Structure**
- **Meta-Analysis**
- **Risk Score based on SNPs associated in the African Meta-Analyses**

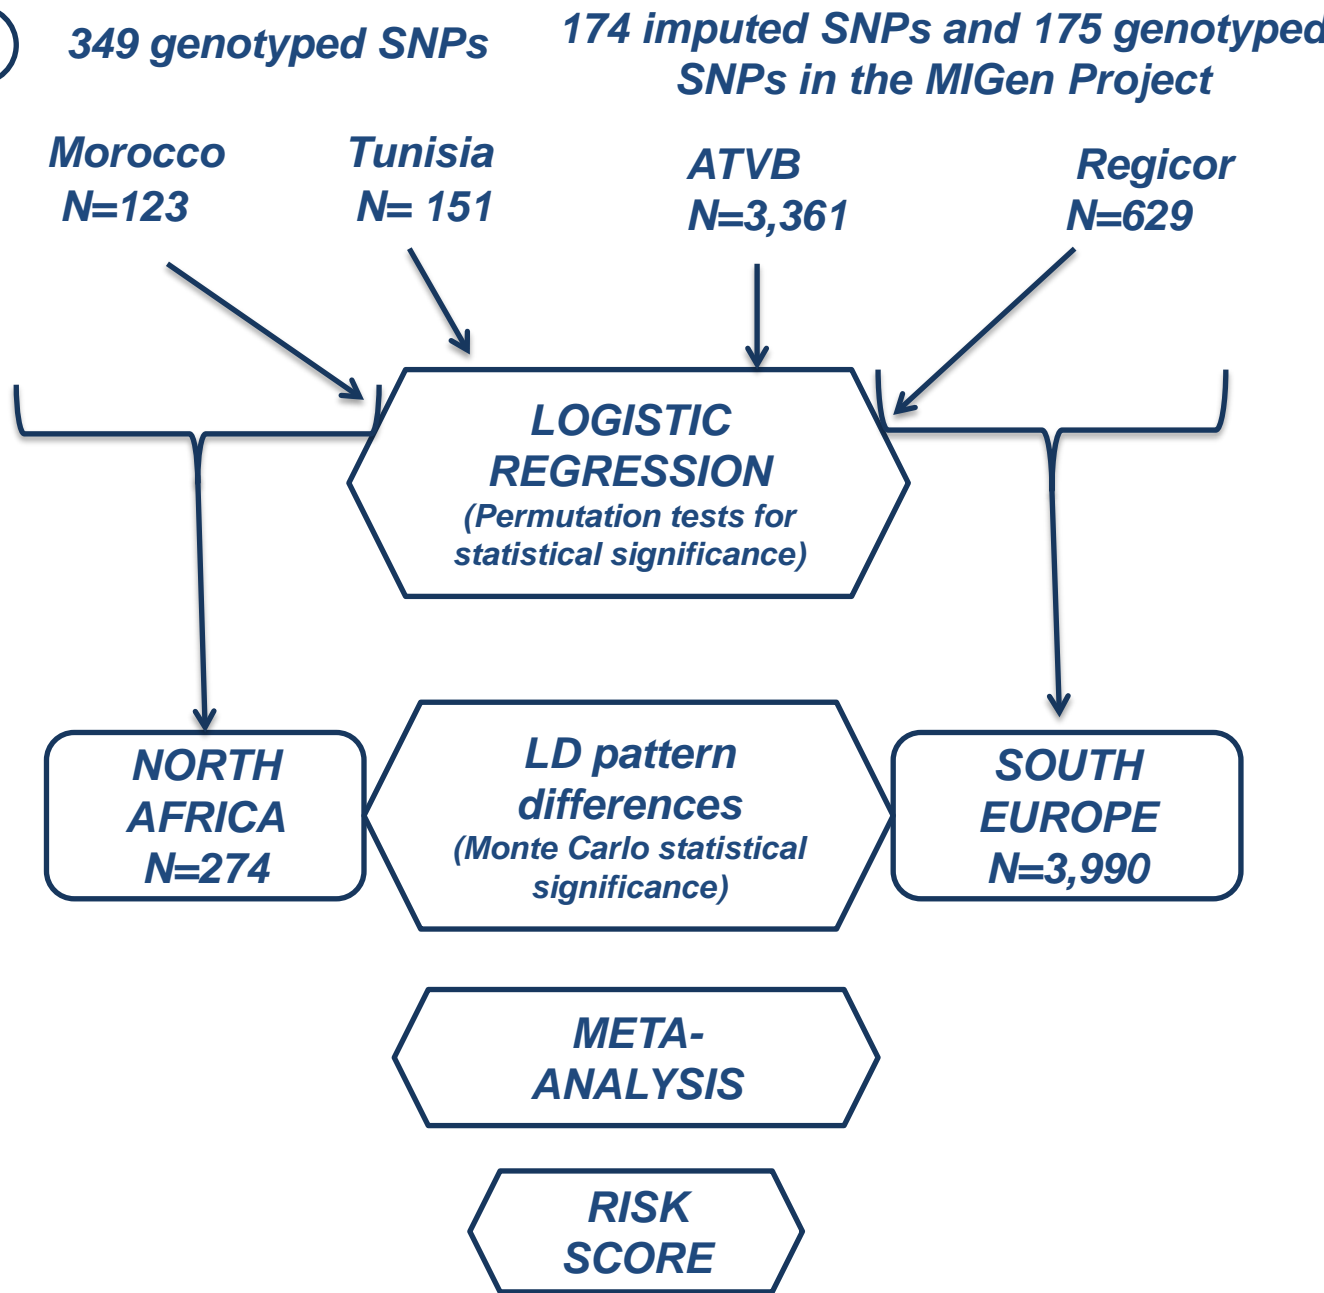

**eFigure 1.** Flowchart of all the analyses performed
