# Supplementary material for: Analysis of Genomic Regions Associated With Coronary Artery Disease Reveals Continent-Specific Single Nucleotide Polymorphisms in North African Populations
Source: PubMed Central journal article supplement (PMC4848325; doi:10.2188/jea.je20150034), 2016-05-05
Supplement: je-26-264-s006.pdf [file je-26-264-s006.pdf]

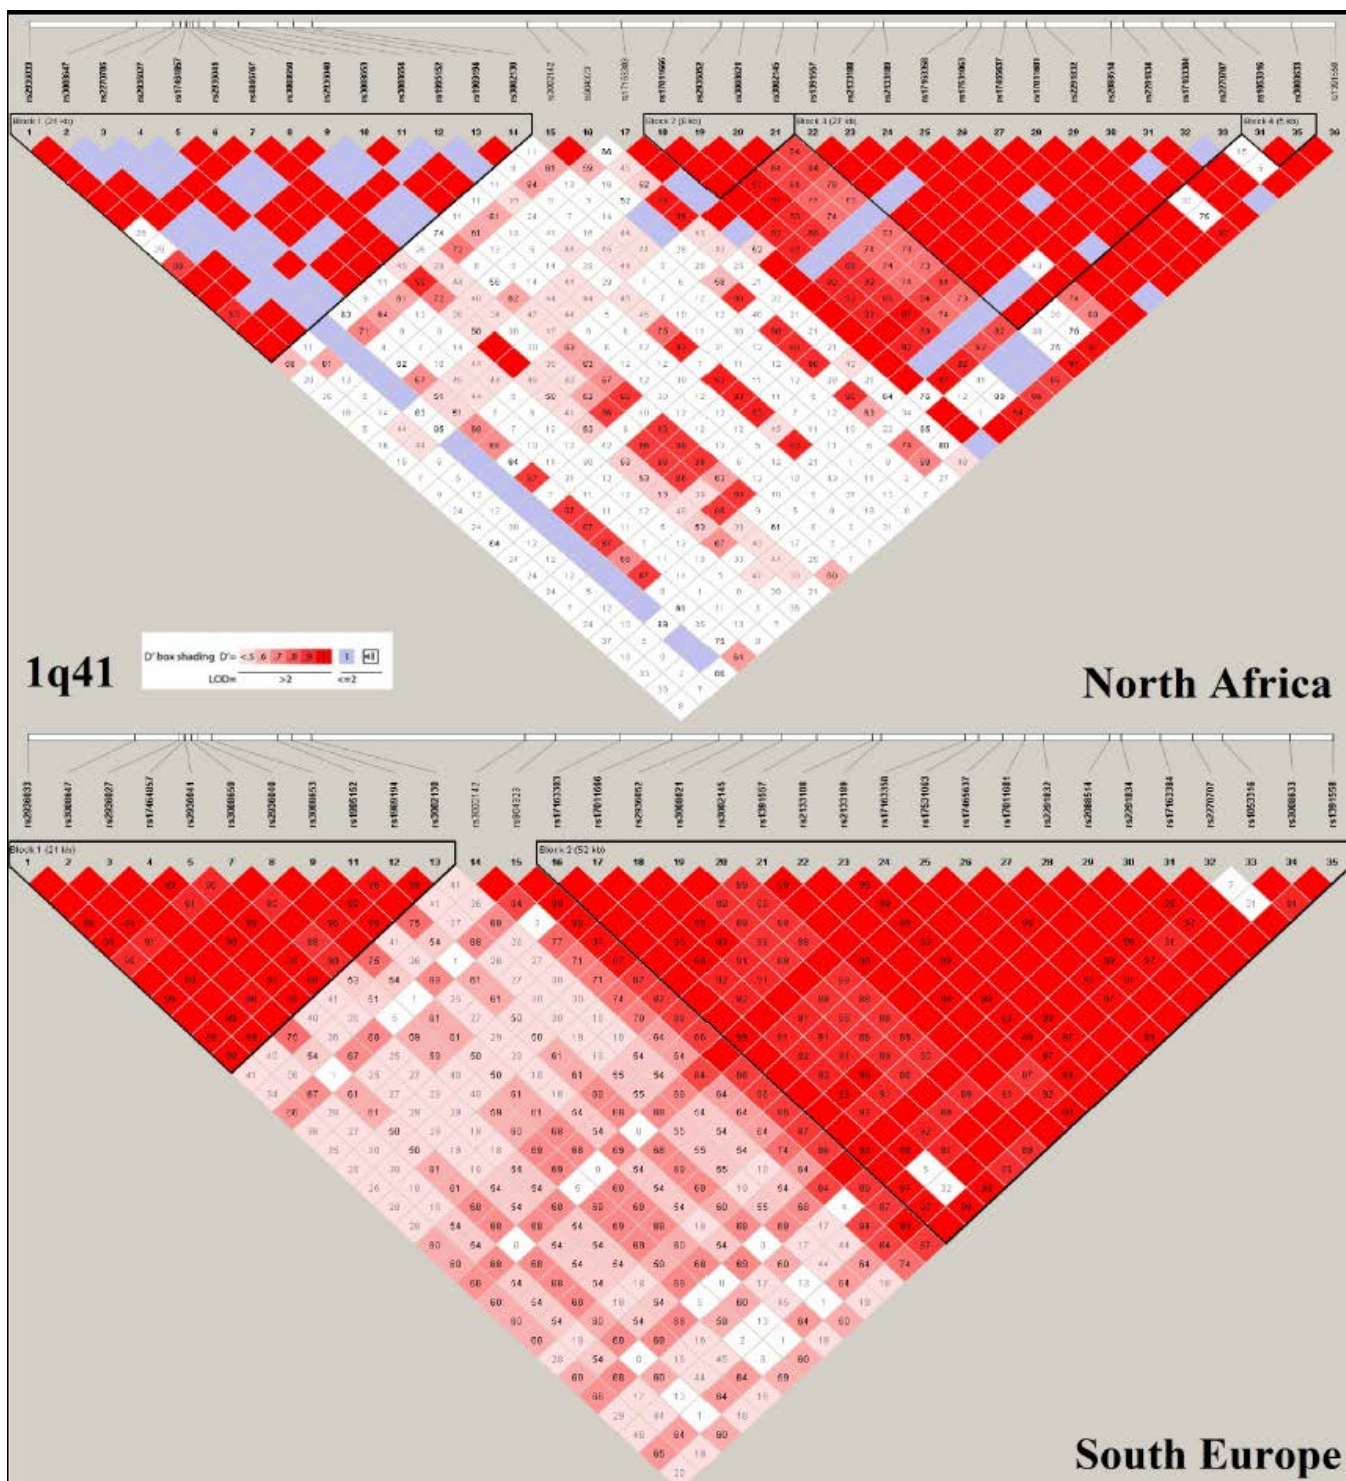

**eFigure 2B.** Linkage disequilibrium patterns and haplotype block structure observed in North Africa and in southern Europe for the region 1q41
