# Supplementary material for: Analysis of Genomic Regions Associated With Coronary Artery Disease Reveals Continent-Specific Single Nucleotide Polymorphisms in North African Populations
Source: PubMed Central journal article supplement (PMC4848325; doi:10.2188/jea.je20150034), 2016-05-05
Supplement: je-26-264-s007.pdf [file je-26-264-s007.pdf]

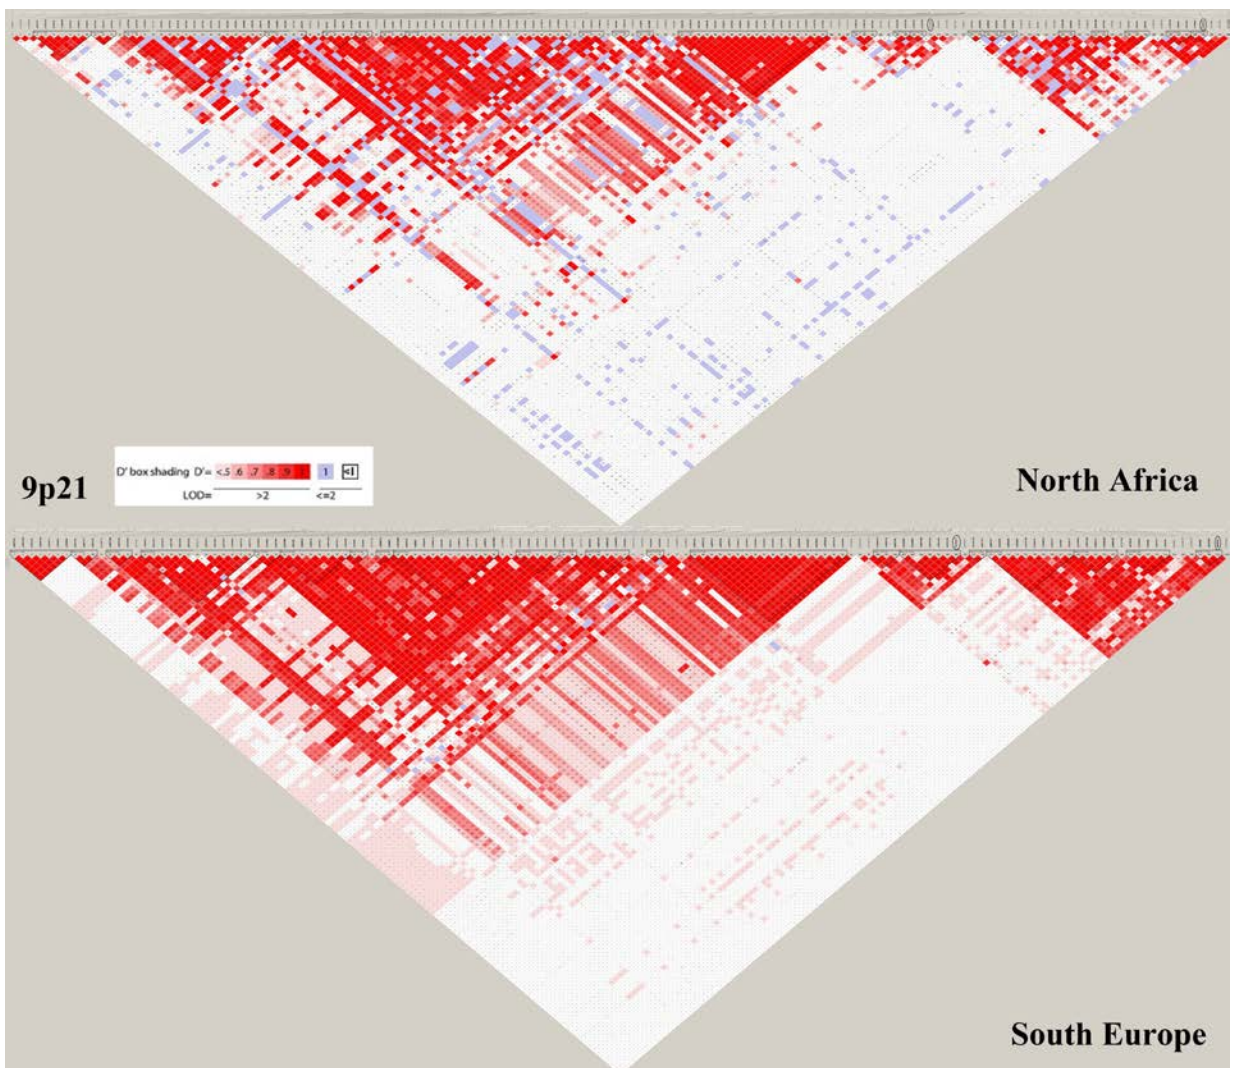

**eFigure 2C.** LD patterns and haplotype block structure observed in North Africa and in South Europe for the region 9p21. LD colors and values are based on  $D'$ . The SNPs associated in the North Africa meta-analysis are marked with a black circle.
