# Supplementary material for: Analysis of Genomic Regions Associated With Coronary Artery Disease Reveals Continent-Specific Single Nucleotide Polymorphisms in North African Populations
Source: PubMed Central journal article supplement (PMC4848325; doi:10.2188/jea.je20150034), 2016-05-05
Supplement: je-26-264-s009.pdf [file je-26-264-s009.pdf]

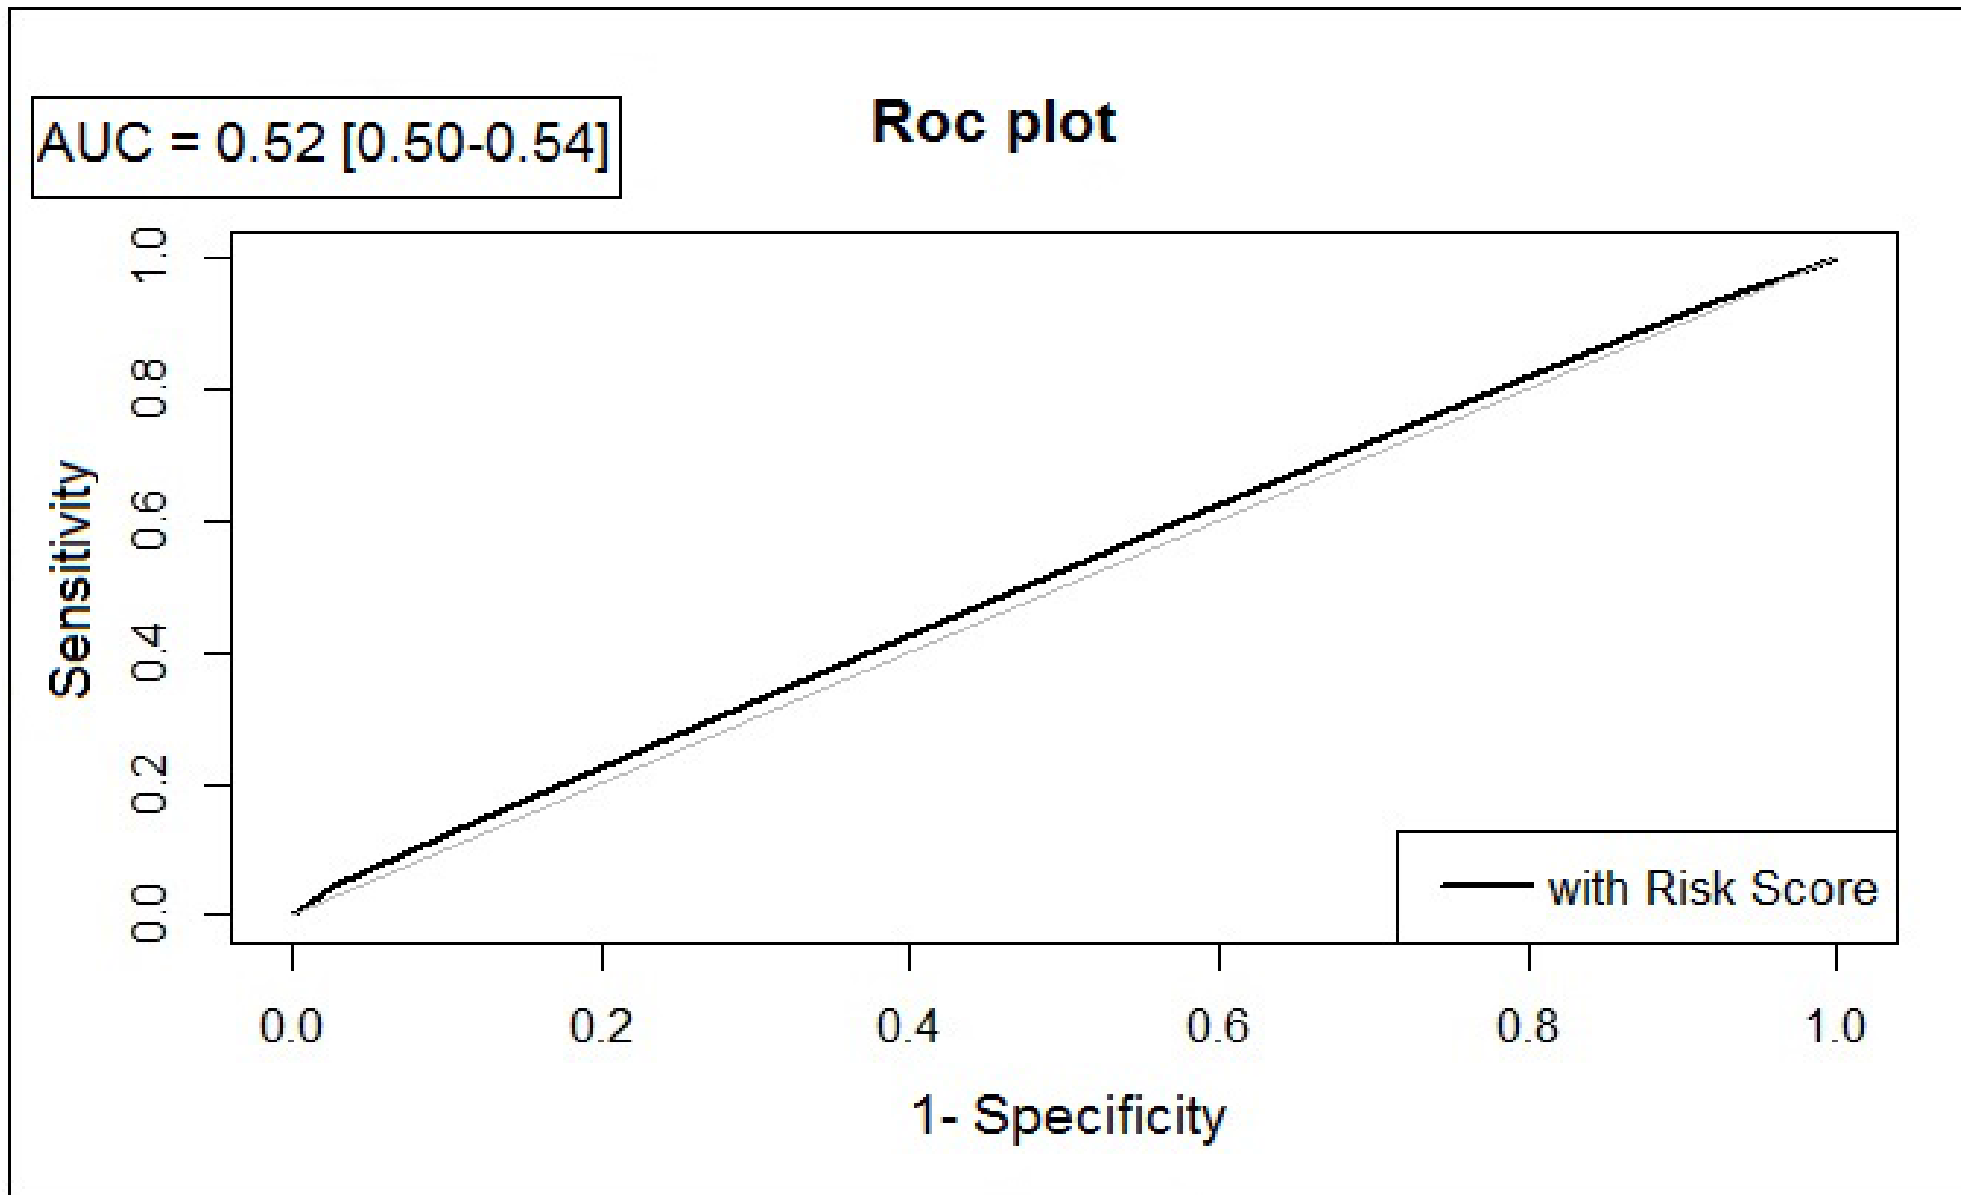

**eFigure 3.** Receiver operating characteristic (ROC) curves in South Europe. The number of risk alleles was based on the risk alleles associated with CAD in North Africans. AUC: Area Under the ROC Curve with 95% confidence interval.
